1           **Transcriptome profiling of pathogen-specific CD4 T cells identifies T-cell-intrinsic**  
2                           **caspace-1 as an important regulator of Th17 differentiation**

3  
4   **One sentence summary:**

5   Our study revealed that DCs shape distinct pathogen-specific CD4 T cell transcriptome and  
6   from which, we discovered an unexpected role for T-cell-intrinsic caspace-1 in promoting Th17  
7   differentiation.

8  
9   **Yajing Gao<sup>1</sup>, Krystin Deason<sup>1</sup>, Aakanksha Jain<sup>1,3</sup>, Ricardo A Irizarry-Caro<sup>1,3</sup>, Igor**  
10 **Dozmorov<sup>1</sup>, Isabella Rauch<sup>2</sup>, Edward K Wakeland<sup>1\*</sup> and Chandrashekhar Pasare<sup>3\*</sup>**

11  
12   <sup>1</sup>Department of Immunology, University of Texas Southwestern Medical Center, Dallas, TX 75390, USA

13   <sup>2</sup>Division of Immunology & Pathogenesis, Department of Molecular & Cell Biology, University of California,  
14   Berkeley, CA 94720, USA

15   <sup>3</sup>Division of Immunobiology, Center for Inflammation and Tolerance, Cincinnati Children's Hospital Medical  
16   Center, Cincinnati, OH 45229, USA

17  
18  
19  
20  
21  
22   \* Correspondence can be addressed to CP or EKW:

23  
24   Chandrashekhar Pasare, Ph.D.

25   Division of Immunobiology, Center for Inflammation and Tolerance

26   Cincinnati Children's Hospital Medical Center,

27   3333 Burnet Ave, Cincinnati, Ohio 45229, USA

28   Phone: (513) 636 6656

29   Fax: (513) 636 5355

30   Email: [Chandrashekhar.pasare@cchmc.org](mailto:Chandrashekhar.pasare@cchmc.org)

31  
32   Edward K. Wakeland, Ph.D.

33   Department of Immunology

34   UT Southwestern Medical Center,

35   5323 Harry Hines Blvd,

36   Dallas, Texas 75390-9093, USA

37   Phone: (214) 648 7330

38   Fax: (214) 648 7331

39   Email: [Edward.Wakeland@UTSouthwestern.edu](mailto:Edward.Wakeland@UTSouthwestern.edu)

40

41 **Abstract**

42 Dendritic cells (DCs) are critical for priming and differentiation of pathogen-specific CD4 T cells.  
43 However, to what extent innate cues from DCs dictate transcriptional changes in T cells leading  
44 to effector heterogeneity remains elusive. Here we have used an *in vitro* approach to prime naïve  
45 CD4 T cells by DCs stimulated with distinct pathogens. We have found that such pathogen-  
46 primed CD4 T cells express unique transcriptional profiles dictated by the nature of the priming  
47 pathogen. In contrast to cytokine-polarized Th17 cells that display signatures of terminal  
48 differentiation, pathogen-primed Th17 cells maintain a high degree of heterogeneity and  
49 plasticity. Further analysis identified caspase-1 as one of the genes upregulated only in  
50 pathogen-primed Th17 cells but not in cytokine-polarized Th17 cells. T-cell-intrinsic caspase-1,  
51 independent of its function in inflammasome, is critical for inducing optimal pathogen-driven  
52 Th17 responses. More importantly, T cells lacking caspase-1 fail to induce colitis following  
53 transfer into RAG-deficient mice, further demonstrating the importance of caspase-1 for the  
54 development of pathogenic Th17 cells *in vivo*. This study underlines the importance of DC-  
55 mediated priming in identifying novel regulators of T cell differentiation.

56

57

## 58 Introduction

59 CD4 T cells play a central role in adaptive immunity through the secretion of specific  
60 effector cytokines and also by regulating B cell activation and CD8 T cell responses (1, 2).  
61 Mature dendritic cells (DCs) are primarily responsible for the priming and differentiation of naïve  
62 CD4 T cells into several effector lineages. Following pathogen recognition through pattern  
63 recognition receptors (PRRs), DCs upregulate MHC Class II and costimulatory molecules and  
64 secrete innate cytokines that dictate the priming and differentiation of distinct T cell lineages (3).  
65 Upon receiving cues from DCs, pathogen/antigen-specific CD4 T cells rapidly proliferate and  
66 undergo transcriptional programming, including the upregulation and stabilization of the lineage-  
67 specific transcription factors (TFs, T-bet for Th1, GATA3 for Th2 and ROR $\gamma$ t for Th17) that  
68 facilitates effector cytokine production. More specifically, Th1 cells produce IFN $\gamma$  which directs  
69 killing of intracellular bacteria and viruses; Th2 cells secrete type-2 cytokines like IL-4, IL-5 and  
70 IL-13 which mediate expulsion of helminths; and Th17 cells produce IL-17A, IL-17F and IL-22  
71 which facilitate the clearance of extracellular bacteria and fungi (4).

72 The differentiation of CD4 T cells *in vivo* in response to a pathogen (here on referred to  
73 as 'pathogen-specific T cells') results in a heterogeneous effector population (5). The frequency  
74 of naïve precursors for specific epitopes is extremely low, ranging from 0.8-10 cells per million  
75 naïve CD4 T cells per epitope (6), making it technically challenging to detect, track and analyze  
76 pathogen-specific T cells *in vivo*. Transcriptional regulation of CD4 T cell differentiation is  
77 influenced by many factors including T cell receptor (TCR) affinity to distinct epitopes (7, 8).  
78 Therefore, studying transcriptional landscape of single specific TCRs may not accurately reflect  
79 the changes dictated by varying TCR strengths. Additionally, pathogen-specific CD4 T cells  
80 exhibit heterogeneity and plasticity (9). For example, functionally significant novel T cell subtypes  
81 (e.g. Th1/Th17 dual-lineage cells) are enriched in barrier tissues and can perform either  
82 pathogenic or regulatory roles (10, 11), but the differentiation mechanisms required to produce

83 such dual-lineages remain largely unknown. Although DCs are major drivers of CD4 T cell  
84 activation and differentiation, lineage-specific polarization by using defined cytokine cocktails  
85 has been a major approach to study CD4 T cell biology (4, 12, 13). This approach fails to take  
86 into account that a broad range of DC-derived cues that might act on T cells during priming and  
87 differentiation. In addition to inducing lineage-specific TFs, DCs impact CD4 T cell differentiation  
88 by altering TCR signaling strength, licensing the expression of co-TFs or regulatory microRNA  
89 species (8, 14).

90 To understand if dendritic cells exposed to different pathogens regulate the transcriptional  
91 profile of newly primed CD4 T cells, we have utilized an *in vitro* approach to prime naive CD4 T  
92 cells. This approach allows an unbiased assessment of pathogen-directed clonal expansion and  
93 differentiation of naïve CD4 T cells. We have found that *in vitro* priming was able to generate  
94 pathogen-specific effector CD4 T cells and the effector lineage commitment was dictated by the  
95 nature of the priming pathogen. Comparison of the transcriptional profile of cytokine-polarized  
96 and pathogen primed Th17 cells led to the identification of a unique gene cluster associated with  
97 DC-mediated priming. We identified caspase-1 to be one of the unique genes upregulated in  
98 pathogen-primed Th17 cells but not in cytokine-polarized Th17 cells. We further established that  
99 caspase-1, independent of its role in inflammasome activation, functions in a T-cell-intrinsic  
100 fashion to promote Th17 differentiation. This study establishes that DCs provide critical cues for  
101 transcriptional programming of CD4 T cells, that are absent during cytokine-driven polarization,  
102 and furthermore provides a framework for identifying novel regulators of CD4 T cell  
103 differentiation.

104

105 **Results**

106 **Dendritic cells exposed to pathogen lysates induce *de novo* differentiation of naïve CD4**  
107 **T cells *in vitro*.**

108 To study the transcriptional regulation of pathogen-specific CD4 T cell during  
109 differentiation, we sought to design and validate an *in vitro* priming system to mimic *in vivo*  
110 priming of naïve CD4 T cells following microbial infections. We posited that *in vitro* priming would  
111 allow the identification and characterization of all pathogen-specific CD4 T cells at various stages  
112 of differentiation. In addition, we predicted that we would be able to determine the specificity of  
113 the generated responses. Dendritic cells, both migratory and lymphoid organ resident, play a  
114 central role in T cell differentiation (3). Therefore, a simple, isolated system that contains core  
115 elements required for T cell priming: dendritic cells, naïve CD4 T cells and complex components  
116 from pathogens, should allow the differentiation of pathogen-specific CD4 T cells. Similar co-  
117 culture approaches have been reported previously for the activation of human and mouse CD4  
118 T cells (15-20). More recent work has elegantly demonstrated that exposure of human  
119 monocytes to different pathogens leads to priming of pathogen-specific CD4 T cells, whose  
120 effector cytokines are dictated by the priming pathogen (15, 21). However, concerns are that  
121 these studies used peripheral blood monocytes or bone-marrow derived dendritic cells (BMDCs),  
122 which are composed of a heterogeneous mixture of macrophages and 'myeloid' DCs with distinct  
123 antigen presentation abilities (22-24). These populations have been shown to deviate from  
124 lymphoid and tissue-resident DC populations (22). Furthermore, the pathogen specificity and  
125 functionality of the primed T cells in the previous studies was not fully established (17-20, 25).

126 We designed the *in vitro* system based on human studies using monocytes but instead  
127 using splenic CD11c<sup>+</sup> DCs (Flt3l-dependent, *ex vivo*) as antigen-presenting cells (APCs) to  
128 prime naïve CD4 T cells isolated from spleen and peripheral lymph nodes (Fig. 1A) (15). Whole-  
129 cell lysates of bacteria including diverse PAMPs and proteins were used as PRR stimuli and

130 source of antigens for DCs. Subsequently, DCs were co-cultured with highly purified naïve CD4  
131 T cells to initiate their activation and differentiation (Fig. 1A and Fig. S1A; Experimental  
132 Procedures). No exogenous peptide or protein was added to ensure that TCRs would solely  
133 respond to pathogen-derived peptides. Recombinant cytokines were also not provided; thus, the  
134 effector response is not dictated by specific exogenous cytokines but solely dependent on  
135 pathogen-induced, DC-derived cytokine milieu.

136 Under this approach, a proportion of co-cultured naïve CD4 T cells underwent  
137 proliferation (CFSE<sup>-</sup>CD90<sup>+</sup>, Fig. 1B) and upregulated T cell activation markers CD25, CD44 and  
138 ICOS (Fig. 1B, lower). CFSE<sup>-</sup>CD90<sup>+</sup> cells also secreted effector cytokines (Fig. 1B, upper right).  
139 T cells that failed to undergo expansion (CFSE<sup>+</sup>CD90<sup>+</sup>) remained in naïve state and did not  
140 produce effector cytokines (Fig. 1B, upper right). In contrast to non-specific polyclonal priming  
141 mediated by CD3 ligation in the presence of LPS stimulated DCs, we observed a binary  
142 distribution between CFSE<sup>-</sup> cells undergoing division and static CFSE<sup>+</sup> T cells (Fig. S1B),  
143 indicating clonal expansion of a small proportion of T cells. A large proportion of static CFSE<sup>hi</sup>  
144 cells suggested a very low frequency of naïve T cells to have undergone active priming (Fig.  
145 S1B). Accordingly, generation of *in vitro* pathogen-primed T cells required pMHC-II:TCR  
146 interaction and costimulation, as well as innate cytokine milieu (for example, IL-12 for generation  
147 of IFN $\gamma$ <sup>+</sup> cells) (Fig. S1C and S1D) thus ruling out the possibility of antigen-independent,  
148 inflammatory cytokine-driven T cell proliferation (26).

#### 149 ***In vitro* priming system generates pathogen-dictated CD4 T cell responses**

150 To test whether this approach can induce differentiation of functional effector CD4 T cells  
151 *in vitro*, we took advantage of three well-studied mouse pathogens: *Listeria monocytogenes* (Lm),  
152 *Citrobacter rodentium* (Cr), and *Staphylococcus aureus* (Sa). The level of proliferation of CD4 T  
153 cells primed by different pathogen lysates was comparable (Fig. S1E). However, CFSE<sup>-</sup> CD4 T

154 cells exhibited distinct cytokine profiles: Cr-primed T cells generated significantly more IL-17A<sup>+</sup>  
155 population compared to both Lm and Sa; Lm-priming generated predominantly IFN $\gamma$ -producing  
156 CD4 T cells and Sa-stimulated DCs primed both IFN $\gamma$ <sup>+</sup> and IL-17A<sup>+</sup> CD4 T cells (Fig. 1C). This  
157 was also evident when we measured these cytokines in the supernatants (Fig. 1D). Th1/Th17  
158 profile observed in the *in vitro* system are in concordance with the dominant responses  
159 previously reported for each pathogen *in vivo* (27-29). Live infection of DCs with these pathogens  
160 also led to similar Th1/Th17 profile as lysates and therefore we used bacterial lysates for rest of  
161 the study to be consistent for antigen dosage and concentration or PRR ligands (Fig. S1C).

162 We sorted the total CFSE<sup>-</sup> CD4 T cell population from Lm- and Cr-primed cultures and  
163 performed mRNA sequencing to compare their global transcriptional profiles (Fig. 1E). Cr-primed  
164 T cells revealed a Th17-associated gene signature, while Lm-primed T cells predominantly  
165 contained a high level of Th1-associated transcripts. Notably, 126 genes were uniquely  
166 expressed in Lm-primed T cells and 233 genes were uniquely expressed in Cr-primed T cells,  
167 when normalized to their CFSE<sup>+</sup> naive counterparts (Fig. 1E; Table S3), indicating pathogen-  
168 associated T cell transcriptome. These experiments established that dendritic cells, exposed to  
169 a complex mixture of pathogen proteins and PRR ligands, can indeed prime naïve CD4 T cells  
170 *in vitro*. More importantly, depending on the nature of the pathogenic stimuli, DCs were able to  
171 shape distinct CD4 T cell transcriptional profiles.

### 172 ***In vitro* pathogen-primed T cells are specific to the priming pathogen**

173 To interrogate whether these *in vitro* primed T cells were specific to the priming pathogen,  
174 we first examined TCR repertoire enrichment by comparing CFSE<sup>-</sup> primed cells to CFSE<sup>+</sup> naïve  
175 pool (Fig. S2A). We observed a selective enrichment of TCR V $\beta$ 10,12,14 and 15 in CFSE<sup>-</sup>  
176 population. Meanwhile, expression of V $\beta$ 13-3, 20, 26 was diluted in CFSE<sup>-</sup> population, indicating  
177 a lack of proliferation of these V $\beta$ -expressing T cells in response to Lm (Fig. S2A). To measure

178 specificity, we rested pathogen-primed CD4 T cells and then restimulated these cells *in vitro* with  
179 irradiated, pathogen lysate fed B cells. We found that primed and rested CD4 T cells secreted  
180 IFN $\gamma$  and IL-17A only when re-stimulated by B cells exposed to the original priming pathogen  
181 (Fig. 2A and S2B). Cytokine production and upregulation of T cell activation markers (CD25,  
182 CD69, ICOS and CD44) were dependent on the dose of lysates used for reactivation, further  
183 confirming the specificity of the responding T cells (Fig. 2A-B and S2B-C). In contrast,  
184 restimulation with the non-priming (mismatched) pathogen did not lead to cytokine secretion at  
185 any of the doses used (Fig. 2A-B and S2B-C), further establishing the specificity of the response.

186 Using a similar mismatch scheme (Fig. 2C), we further tested whether *in vitro* primed CD4  
187 T cells respond to infection by the priming pathogen *in vivo*. To that end, we transferred Lm- or  
188 Cr- primed CD45.2<sup>+</sup> T cells to CD45.1<sup>+</sup> congenic, immune competent recipients and recipients  
189 were challenged with intraperitoneal Lm infection 48 hours after transfer (Fig. 2C and S2D). Mice  
190 that received pathogen-primed CD4 T cells but were not subsequently infected with  
191 *L.monocytogenes* served as baseline controls. Donor CD4 T cells proliferated in response to  
192 matched pathogen re-challenge (Lm-primed donor cells and Lm infection; Fig. 2C) but did not  
193 respond to mismatched pathogen re-challenge (Cr-primed donor cells and Lm infection) in the  
194 spleen (Fig. 2D) and lymph nodes (Fig. S2E). In addition, matched re-challenge induced  
195 significant upregulation of cell surface ICOS expression on donor cells (Fig. 2E). ICOS  
196 upregulation on recipient CD45.1<sup>+</sup> CD4 T cells was unaffected by the transfer of Lm- or Cr-  
197 primed T cells (Fig. 2E and S2F). It is important to note here that we used a very low dose of Lm  
198 for challenge and responses were assessed shortly after infection that precluded the possibility  
199 of *de novo* priming of naïve CD4 T cells in the recipient. In summary, these data allow us to  
200 conclude that the *in vitro* priming system generates effector T cells bearing TCRs that are likely  
201 to be reactive to peptides derived from the original priming pathogen.



202 **Pathogen-primed Th17 cells are comprised of heterogeneous subsets and display a**  
203 **transcriptional profile different from cytokine-polarized Th17 cells.**

204 Among all the effector T cell lineages, Th17 cells have been reported to have a high  
205 degree of plasticity and heterogeneity (30). They are sensitive to variations in polarizing  
206 cytokines between distinct microenvironments (31), and can convert to regulatory subsets during  
207 the resolution of inflammation (32). This intrinsic fine-tuning of Th17 cells makes them an ideal  
208 effector lineage to dissect their transcriptional regulation during pathogen-induced differentiation.  
209 We generated mice that would allow fate-mapping of CD4 T cells that commit to making IL-17A  
210 ('17A-fm' mice; *Il17a-cre<sup>+/-</sup>*; *Rosa26-flox-stop-flox-tdTomato<sup>+/-</sup>*) (33). Cr-primed CD4 T cells  
211 contained a higher proportion of tdTomato<sup>+</sup> cells than Lm-primed CD4 T cells (Fig. S3A),  
212 consistent with our previous data (Fig. 1C), indicating successful tracing of Th17 cells committed  
213 for IL-17A production.

214 Traditional cytokine-differentiated Th17 cells (cdTh17) have been widely used for global  
215 transcriptional profiling (12, 13). To understand transcriptional programming of pathogen-  
216 specific Th17 lineage cells, we used Cr-primed DCs to differentiate 17A-fm naïve T cells or  
217 polarized 17A-fm naïve T cells to Th17 lineage using antibodies and cytokine cocktails (Fig. 3A).  
218 tdTomato<sup>+</sup> populations, FACS-sorted from both conditions, were subjected to RNA-sequencing  
219 analysis. Clustering of Th17 associated cytokine and TF expression confirmed that tdTomato<sup>+</sup>  
220 population in pathogen-primed cultures are highly enriched for Th17 cells, compared to CFSE<sup>+</sup>  
221 or CFSE<sup>+</sup> tdTomato<sup>-</sup> populations (Fig. S3B). Principal component analysis (PCA) demonstrated  
222 a distinct transcriptional profile between cytokine-differentiated Th17 cells and Cr-primed Th17  
223 cells (Fig. 3B and Table S4). Pathway analysis revealed that ppTh17 cells expressed high levels  
224 of genes related to diverse T cell effector functions while cdTh17 cells upregulated cell cycle-  
225 and proliferation-related genes (Fig. 3C and Table S5). Consistently, cdTh17 cells exhibited a  
226 strongly activated phenotype characterized by the extremely high expression of Th17-lineage

227 master TFs *Rorc*, *Rora* and *Ahr* and the enhanced expression of Th17 lineage cytokines *Il17a*,  
228 *Il17f* and *Il22* (Fig. 3D). In addition, cdTh17 cells significantly upregulated *Il9*, known to further  
229 promote Th17 lineage (34) (Fig. 3D). In contrast, ppTh17 cells exhibited a multi-lineage  
230 phenotype by expressing an array of Th1 and Th2-associated genes, such as transcription factor  
231 T-bet (*Tbx21*), GATA3 (*Gata3*) and cytokines (*IFN $\gamma$* , *Il4*, *Il5*, *Il13*), representing potential lineage  
232 plasticity (35) (Fig. 3D). Interestingly, cdTh17 cells expressed a high level of transcription factor  
233 *Foxp3*, marking TGF $\beta$  induced co-differentiation of regulatory T cell lineage with Th17 lineage  
234 (36). In comparison, ppTh17 expressed a decreased level of *Foxp3*, indicating that Cr-specific  
235 T cells do not transdifferentiate to Tregs. To test whether Cr-specific Th17 cells transdifferentiate  
236 into Th1 cells, we primed naïve T cells from 17- $\gamma$  double reporter mice (*Il17a-cre<sup>+/-</sup>*; *Rosa-flox-*  
237 *stop-flox-tdTomato<sup>+/-</sup>*; *Ifng-ires-yfp<sup>+/-</sup>*) with Cr. From day 5 post stimulation, we observed the  
238 emergence of tdTomato<sup>+</sup>YFP<sup>+</sup> cells indicating emergence Th1 transdifferentiated cells from T  
239 cells previously committed to Th17 lineage (Fig. 3E). The proportion of this population increased  
240 as the cells proliferated over an extended period of differentiation (from day 5 to day 10) (Fig.  
241 3E). In contrast, cdTh17 cells did not re-express YFP, even after the removal of polarizing  
242 cytokines (Fig. 3E). Although studies have shown polarized Th17 cells are able to transit to Th1  
243 cells upon secondary stimulation (37, 38), our data indicate that plasticity during primary  
244 commitment is limited in cdTh17 cells.

245 Further analysis of the transcriptome revealed that ppTh17 cells upregulated a set of  
246 genes encoding membrane-associated proteins that are important for chemotaxis (Fig. 3F, Table  
247 S5), including chemokine receptors (*Ccr1* and *Cxcr3*), extracellular matrix metalloproteases  
248 (*Mmp7* and *Mmp9*), myosins (*Myo1f* and *Myo1g*), S1P receptor family (*S1pr1* and *S1pr4*) and  
249 G-protein-coupled receptor EBI2 (*Gpr183*) (Fig. 3F and Table S6) (39-42). Interestingly, we also  
250 found highly enriched interferon-stimulated genes (ISGs) in naïve and ppTh17s (Fig. S3C), as  
251 IFI16 (*Ifi204*) and STING-activation has been demonstrated to mediate anti-proliferative effect

252 in CD4 T cells and promote memory formation (43). We sought to determine whether transcripts  
253 of ppTh17s denote the acquisition of memory T cell state. Comparison of metabolic gene  
254 datasets indicates that ppTh17 cells upregulated AMPK pathway, fatty acid oxidation and  
255 oxidative phosphorylation programs that maintain memory T cell function (Fig. 3G) (44, 45);  
256 cdTh17 cells upregulated c-Myc and HIF1 $\alpha$  targets and resemble terminally differentiated  
257 effector T cells that employ glycolysis as energy fuel (Fig. 3G) (46-48). Consistently, ppTh17  
258 expressed genes upregulated in memory T cells, such as *Ii7r* and *Ii15ra* (Fig. S3D), which are  
259 important for the maintenance of memory T cells through IL-7R and IL-15R signaling (49, 50).  
260 To further test our hypothesis on a global transcriptional landscape, we performed gene set  
261 enrichment analysis (GSEA) with memory versus effector T cell molecular signature from  
262 ImmuneSigDB database (51). GSEA analysis indicated that memory T cell-associated genes  
263 were enriched in ppTh17s compared to cdTh17s (Fig. 3H, upper). Effector T cell-associated  
264 genes were enriched in cdTh17s, consistent with their metabolic status (Fig. 3G and H, lower;  
265 Table S7).

266 We further validated some highly upregulated genes in ppTh17 compared to cdTh17 by  
267 quantitative RT-PCR (Fig. S3E). Since the experiments so far have focused on identifying  
268 distinct transcriptional profiles between pathogen-primed or cytokine-polarized CD4 T cells *in*  
269 *vitro*, we also assessed the physiological relevance of our findings. We infected the 17A-fm  
270 reporter mice with *C. rodentium*, sorted total CD4<sup>+</sup>tdTomato<sup>+</sup> cells (consist of differentiated, Cr-  
271 specific Th17 cells) from mesenteric lymph nodes (mLNs) at the peak of infection, and assessed  
272 the expression of these key variable genes (Fig. S3E and S3F). The majority of the genes tested  
273 had comparable expressions between CD4<sup>+</sup>tdTomato<sup>+</sup> cells and ppTh17 cells. Furthermore,  
274 unsupervised hierarchical clustering showed that ppTh17s resembled *in vivo* effector Th17 cells  
275 (Fig. S3F), indicating a close functional relationship between ppTh17 cells and *in vivo* generated  
276 Th17 cells during infection.

277 In summary, we find that in contrast to cytokine-polarized Th17 lineage cells that display  
278 features of terminal differentiation, DC-mediated priming led to Th17 lineage cells of higher  
279 plasticity and heterogeneity as observed in *in vivo* primed T cells.

280 **Identification of caspase-1 as a DC-induced, T-cell-intrinsic regulator of pathogen-**  
281 **specific Th17 cell differentiation.**

282 Our analysis (Fig. 3B-D) and some other evidence suggest DCs directly modulate the  
283 heterogeneity and plasticity of Th17 cells (15). Whether DCs regulate Th17 responses through  
284 the expression of specialized regulators is still unclear (52). To identify such regulators, we  
285 focused on genes that would be uniquely expressed in ppTh17 but not in cdTh17 cells.  
286 Surprisingly, *Casp1* (encoding caspase-1) emerged as an interesting candidate, with 5- to 10-  
287 fold induction of expression in ppTh17 cells compared to cdTh17 cells or naïve T cells (Fig. 4A  
288 and S3E). We also found that *Casp1* is upregulated in *ex vivo* effector T cell population primed  
289 in mLN following *C. rodentium* infection (Fig. S3F). Caspase-1 and caspase-11 (gene name as  
290 *Casp4*) are inflammatory caspases that have overlapping effector functions downstream of  
291 inflammasome activation primarily in myeloid cells (53, 54). However, the role of these caspases  
292 in T cells is not well defined. *Casp1* and *Casp4* transcripts are upregulated in memory T cells  
293 compared to naïve T cells in Immgen database ([www.immgen.org](http://www.immgen.org); Fig. S4A). However, *Casp4*  
294 levels are not significantly different between ppTh17 and cdTh17 (Fig. 4A and S4B), indicating  
295 that *Casp4* may be upregulated upon TCR activation but *Casp1* is induced in T cells by unknown  
296 cues from DCs.

297 To test whether DC-induced caspase-1 plays a role in pathogen-specific Th17  
298 differentiation, we used *Casp1* $\Delta$ 10 mice which specifically lack the expression of caspase-1 but  
299 not caspase-11 (55). We found *Casp1* $\Delta$ 10 T cells to be defective in Th17 differentiation following  
300 *in vitro* priming with Cr-stimulated WT DCs (Fig. 4C and D). Commitment to Th1 or Th2 lineages

301 in Casp1 $\Delta$ 10 CD4 T cells was unaffected (Fig. 4E). There was no difference in proliferation  
302 between WT and Casp1 $\Delta$ 10 T cells during *in vitro* priming (Fig. S4C). These results suggest a  
303 highly critical role for T-cell-intrinsic caspase-1 in inducing optimal Th17 response during  
304 pathogen-mediated differentiation.

### 305 **Caspase-1 functions in CD4 T cells independently of its canonical enzymatic activity or** 306 **inflammasome activation**

307 The role of caspase-1 in inducing pyroptotic cell death in HIV-infected CD4 T cells has  
308 been previously demonstrated (56, 57). However, the role of T-cell-intrinsic caspase-1 in normal  
309 CD4 T cell differentiation is still unclear. When we examined the expression pattern of *Casp1*  
310 transcripts during differentiation, we found that *Casp1* mRNA increased temporally, correlating  
311 with the increase of IL-17A-fm-tdTomato signal (Fig. 4F and S4D). Similarly, we found caspase-  
312 1 protein to be expressed highly after day 7 post stimulation and is maintained through day 12  
313 with the highest levels expressed in CFSE<sup>-</sup> differentiated population (Fig. 4G-H and S4E).  
314 However, in primed T cells, we did not find cleaved caspase-1 p20, an active product resulted  
315 from inflammasome activation in macrophages (Fig. 4G-H). The absence of cleaved form  
316 suggests that the role of caspase-1 in CD4 T cells could be independent of its canonical function  
317 in the inflammasome complex as an IL-1 cleaving enzyme (58). Consistent with this idea, we did  
318 not observe a defect in Cr-induced priming in *Asc*<sup>-/-</sup> and *Il1b*<sup>-/-</sup> CD4 T cells (Fig. 4I). IL-1 $\beta$ ,  
319 secreted following inflammasome activation, has been shown to promote Th17 responses *in*  
320 *vivo* (59). However, supplementing IL-1 $\alpha$  or IL-1 $\beta$  to Casp1 $\Delta$ 10 T cells cultures failed to rescue  
321 the defect in IL-17A<sup>+</sup> cell differentiation (Fig. S4F), suggesting a function for caspase-1 that is  
322 independent of its IL-1 $\beta$  cleavage activity.

323 Given that we did not observe cleaved caspase-1 in CD4 T cells, we looked into a possibly  
324 catalytically-independent function of caspase-1. Caspase activation and recruitment domain

325 (CARD) of caspase-1 facilitates homeostatic binding to effector proteins such as ASC and RIP2  
326 (54). Binding of caspase-1 to RIP2 through CARD, for example, promotes NF- $\kappa$ B signaling  
327 independent of its enzymatic activity (60). To test the possible scaffolding function of caspase-  
328 1, we ectopically reconstituted Casp1 $\Delta$ 10 CD4 T cells with full-length (FL), CARD-deficient  
329 ( $\Delta$ CARD) or enzymatically inactive (EnzDead) caspase-1 and investigated their ability to induce  
330 Th17 lineage commitment (Fig. S4G). Reconstitution of FL and EnzDead caspase-1 resulted in  
331 an increase of IL-17A-producing T cells compared to vector alone but  $\Delta$ CARD failed to promote  
332 Th17 differentiation (Fig. 4J). EnzDead caspase-1 led to modestly enhanced Th17 differentiation  
333 than FL-caspase-1, suggesting that inhibiting catalytic activity might promote functions  
334 associated with the CARD domain of caspase-1 (Fig. 4J). Overall these data provide compelling  
335 evidence that T-cell-intrinsic caspase-1, in an inflammasome-independent fashion, promotes  
336 Th17 differentiation.

### 337 **T-cell-intrinsic caspase-1 is required for Th17-mediated disease *in vivo*.**

338 Even though we found that absence of T-cell-intrinsic caspase-1 affected the generation  
339 of pathogen primed Th17 cells, TCR activation- and cytokine cocktail-driven Th17 polarization  
340 (Fig. S5A) and proliferation (Fig. S5B) was unaffected. This prompted us to examine the *in vivo*  
341 relevance of our findings. By analyzing steady-state T helper cell populations in co-housed WT  
342 and Casp1 $\Delta$ 10 mice, we found reduced IL-17A<sup>+</sup>% (Fig. S5C) and IL-22<sup>+</sup>% (Fig. S5D) CD4 T  
343 cells in the spleen, mLN and small intestine lamina propria (LP) of Casp1 $\Delta$ 10 mice, consistent  
344 with previous reports (61). The percentage of IFN $\gamma$ -producing CD4 T cells was unchanged in  
345 mLN and LP but increased in the spleens of Casp1 $\Delta$ 10 mice (Fig. S5E). Since these outcomes  
346 could be a result of caspase-1 deficiency in myeloid cells, we further investigated the role of T  
347 cell autonomous caspase-1 *in vivo* by using a T cell transfer model of colitis. In this approach,  
348 highly purified naïve CD4 T cells from WT and Casp1 $\Delta$ 10 mice are transferred to *Rag1*<sup>-/-</sup>

349 recipients thus restricting the genetic deficiency to the CD4 T cell compartment. Since  
350 transferred naïve CD4 T cells differentiate in response to components of gut microbiota and  
351 germ-free mice develop a very mild disease (62, 63), this approach would allow us to test the  
352 significance of our *in vitro* priming system.

353 We found that *Rag1*<sup>-/-</sup> animals that received Casp1Δ10 naïve CD45RB<sup>hi</sup> CD4 T developed  
354 very mild disease when compared to WT T cell recipient mice that developed measurable colitis,  
355 including significant weight loss (Fig. 5A) and disease progression (Fig. 5B). Recipients of WT  
356 T cells also showed significant colon shortening compared to non-T cell transferred controls (Fig.  
357 5C). However, transfer of Casp1Δ10 T cells did not lead to this disease manifestation (Fig. 5C).  
358 Transfer of WT T cells also led to severe colonic pathology, marked by transmural infiltration of  
359 leukocytes, epithelial cell hyperplasia and submucosal morphological changes, while transfer of  
360 Casp1Δ10 naïve T cells induced significantly less leukocyte infiltration and morphological  
361 changes associated with colitis (Fig. 5D and S5F). We observed significantly lower IL-17A<sup>+</sup>IFNγ<sup>+</sup>  
362 in mLNs and colons of Casp1Δ10 T cell recipients compared to WT T cell recipients (Fig. 5E).  
363 These IL-17A<sup>+</sup>IFNγ<sup>+</sup> pathogenic Th17 cells have been demonstrated to be critical for the  
364 induction of T cell mediated-colitis and development of pathology (10). Of note, there was no  
365 difference in the proportion of IL-17A<sup>+</sup>IFNγ<sup>-</sup> non-pathogenic population between WT and  
366 Casp1Δ10 recipients (Fig. S5G). In contrast, we observed the significantly less splenic  
367 expansion of total IL-17A<sup>+</sup> Casp1Δ10 cells (Fig. 5F), consistent with the reduced circulating IL-  
368 17A levels throughout the course of the disease (Fig. 5G). Overall these data support that T-  
369 cell-intrinsic caspase-1 selectively controls the differentiation of both pathogen-specific and auto-  
370 inflammatory Th17 lineage cells. Furthermore, even though cells of both innate and adaptive  
371 immune system express caspase-1, these data provide compelling evidence for a distinct role  
372 for caspase-1 in regulating Th17 biology.



## 373 Discussion

374 Although dominant and protective CD4 T cell responses to specific pathogens are well  
375 understood, transcriptional profiling of newly differentiated pathogen-specific CD4 T cells,  
376 following *in vivo* infections, has been lacking due to the absence of tools to identify all responding  
377 CD4 T cells. A recent method has highlighted an *in vitro* priming and *de novo* differentiation of  
378 naïve pathogen-specific human CD4 T cells by autologous pathogen-stimulated monocytes (15,  
379 21). This isolated priming system is freed from the use of exogenous polarizing cytokines and  
380 strong or repeated antigenic exposure, allowing mapping of a primary, pathogen-specific CD4 T  
381 cell response. Combining the *in vitro* priming system with genetic fate-mapping and RNA-  
382 sequencing, we were able to track and profile the differentiation of murine pathogen-specific  
383 CD4 T cells. Consistent with previous studies, we found that while CD4 T cells primed against a  
384 particular pathogen differentiate into one dominant effector lineage, other subtypes also co-exist  
385 (Fig. 1C-E) (5, 15). In addition, transcriptional analysis of fate-mapped Th17 cells suggests the  
386 existence of multiple sub-lineages (Th2/Th17, IL-10- or GM-CSF- secreting populations) (Fig.  
387 3D). The heterogeneity of the T cell response is presumably dictated by DCs encountering a  
388 complex mixture of PAMPs unique to each pathogen (3). But why and how only certain bacteria  
389 species induce Th17 cells still remains unclear. In addition to *C.rodentium*, several other  
390 mucosal pathogens (*e.g.* EHEC) and commensals (*e.g.* Segmented Filamentous Bacteria) favor  
391 a Th17-dominant response, and this ability was attributed to their interaction with distinct  
392 intestinal microenvironments (31, 64-67). Interestingly, we observed that both live Cr- and Cr  
393 lysate-stimulated splenic CD11c<sup>+</sup> DCs are sufficient to induce Th17 cells (Fig. 1C and S1F),  
394 suggesting that in addition to the unique mucosal microenvironment, evolutionarily conserved  
395 ligands in certain gut-associated bacteria could promote a Th17 response. The molecular  
396 mechanisms that drive this tailored response require further investigation.



397 Our data suggest that DCs influence transcriptional programming of T cells that extends  
398 beyond activation and effector cytokine production. CD4 T cells differentiated by pathogen-  
399 stimulated DCs showed transcriptional profiles that display lineage plasticity and features of  
400 memory differentiation (Fig. 3). DC-dependent programming also promotes CD4 functional  
401 heterogeneity and expression of genes associated with of T cell migration and motility (Fig. 3).  
402 In line with our idea that DC-induced transcriptome contains context-specific genes that fine-  
403 tune CD4 T cell response, we found induction of caspase-1 only in T cells that were primed by  
404 pathogen-stimulated DCs. Our data also firmly establish that caspase-1, independent of its role  
405 in inflammasome activation and IL-1 $\beta$  production, plays a T-cell-intrinsic role for the  
406 differentiation of Th17 lineage cells. Perplexingly, cytokine-mediated polarization of Th17 cells  
407 neither induce caspase-1 nor need caspase-1 for optimal differentiation, thus highlighting the  
408 fact that these cells might not resemble physiologically generated Th17 cells. The results from  
409 the T cell transfer model of colitis extended the role of caspase-1 to the differentiation of auto-  
410 inflammatory Th17 cells. Our data also redefine the role of caspase-1 in Th17-mediated  
411 inflammatory disease *in vivo*. Earlier studies have reported that caspase-1 knockout animals  
412 have ameliorated disease in several chronic autoimmune models (68-70). At the time this was  
413 attributed to abrogated IL-1 $\beta$  and IL-18 production during inflammasome activation in myeloid  
414 cells (69, 71). Our results suggest the possibility that T-cell-intrinsic deficiency of caspase-1  
415 impairing Th17 commitment could have also contributed to the phenotypes. Since the majority  
416 of the studies on inflammasome components harnessed whole body deficient mice, further  
417 efforts would be necessary to dissect the specific roles of caspase-1 in innate and adaptive  
418 immune compartments in regulating T cell differentiation and Th17-associated disease  
419 outcomes.

420 Despite the report that the effector function of human Th1 cells is enhanced by  
421 complement-driven, caspase-1-dependent inflammasome activation within CD4 T cells (72), we

422 observed a moderately increased Th1 commitment in Casp1 $\Delta$ 10 T cells in mouse (Fig. 4E and  
423 S5E). Importantly, we demonstrated that the role of caspase-1 in controlling Th17 differentiation  
424 is independent of its enzymatic activity and depends on its CARD domain. Recent work has  
425 shown that caspase-1 is expressed but dispensable for IL-1 $\beta$  production in Th17 cells (73), as  
426 we found no difference in the ability of full-length or enzymatically inactive caspase-1 in driving  
427 Th17 differentiation. Additionally, caspase-1 seems to have a critical function for regulating Th17  
428 differentiation by possibly interacting with other proteins in the cytosol using its CARD domain.  
429 A variety of proteins have been reported to contain core CARD domains, such as BCL10 and  
430 AIRE (74, 75), posing a wide possibility for the interaction partners for caspase-1. The putative  
431 interaction partner itself may also be regulated by an appropriate differentiation signal, in order  
432 for caspase-1 to function only in DC-mediated Th17 priming. Evolutionarily, caspase-1 in early  
433 vertebrates lacks the ability to cleave IL-1 (76), suggesting a possible regulatory trait of these  
434 proteins. Indeed, other CARD-containing proteins have important roles beyond the involvement  
435 in inflammatory and apoptotic cell death, particularly in linking T cell receptor activation to  
436 signaling cascade (77).

437         The current approaches used to study T cell priming and differentiation *in vivo* depend on  
438 TCR transgenic models or identification of epitope-specific T cells by pMHC tetramers (78). The  
439 *in vitro* differentiation method relies on the use of anti-CD3/CD28 antibodies and exogenous  
440 recombinant cytokines (4, 12, 13). These three approaches, although very informative, fail to  
441 address the diverse specificity of TCRs or the heterogeneity of the responses. Additionally, since  
442 specific signals received by a naïve CD4 T cell during a critical window of differentiation are likely  
443 to dictate its fate, it is tempting to speculate that cytokine-driven T cell differentiation, although  
444 important for the analysis of certain aspects of T cell biology, deviates considerably from a  
445 physiological immune response. The *in vitro* priming approach described here enables the study  
446 of the antigen-specific CD4 T cell differentiation using physiological levels of stimulation provided

447 by DCs to generate multi-lineage and oligoclonal pathogen-specific T cells. Furthermore, genetic  
448 manipulations can be used to explore the roles of molecular pathways in both CD4 T cells and  
449 DCs that will open avenues for detailed mechanistic studies.

450 Approaches using DCs and other APCs to prime antigen-specific CD4 and CD8 T cells  
451 have been explored in both human and mouse studies (15, 79). However, our studies using the  
452 murine system have allowed us to establish the specificity and also reveal the *in vivo* relevance  
453 of these *in vitro* primed T cells. Notably, we have used splenic DCs as APCs, which are  
454 predominately composed of CD11c<sup>+</sup>CD11b<sup>-</sup> and CD11c<sup>+</sup>CD11b<sup>+</sup> populations (80). This is  
455 currently a limitation of our study and future efforts could focus on using specific DC  
456 subpopulations to dissect their impact on dictating transcriptional profile of responding CD4 T  
457 cells. Additionally, it would be worthwhile to also use tissue resident or migratory DC populations  
458 when investigating CD4 T cell responses to tissue invading or compartmentalized pathogens.  
459 Tissue-resident DCs, for example, lamina propria CD103<sup>+</sup>DCs, may generate distinct T cell  
460 responses and transcriptional profiles that are relevant to mucosal immunity (31, 81).

461 Taken together, our work highlights a novel workflow for studying pathogen-specific CD4  
462 T cell differentiation. Conceptually, the dataset from this study provides experimental evidence  
463 for the importance of dendritic cells in dictating global transcriptional programming of antigen-  
464 specific CD4 T cells. Integration of a systems biology approach into this *in vitro* priming system  
465 empowers high-throughput analysis of anti-microbial T cell responses to discover novel players  
466 (such as caspase-1) in CD4 T cell activation and differentiation.

## 467 References

- 468
- 469 1. S. Crotty, A brief history of T cell help to B cells. *Nat Rev Immunol* **15**, 185-189 (2015).
- 470 2. M. J. Bevan, Helping the CD8+ T-cell response. *Nat Rev Immunol* **4**, 595-602 (2004).
- 471 3. A. Iwasaki, R. Medzhitov, Regulation of adaptive immunity by the innate immune system. *Science* **327**,
- 472 291-295 (2010).
- 473 4. J. Zhu, H. Yamane, W. E. Paul, Differentiation of Effector CD4 T Cell Populations. *Annual Review of*
- 474 *Immunology* **28**, 445-489 (2010).
- 475 5. F. Sallusto, Heterogeneity of Human CD4+ T Cells Against Microbes. *Annual Review of Immunology* **34**,
- 476 317-334 (2016).
- 477 6. M. K. Jenkins, J. J. Moon, The role of naïve T cell precursor frequency and recruitment in dictating
- 478 immune response magnitude. *Journal of Immunology (Baltimore, Md. : 1950)* **188**, 4135-4140 (2012).
- 479 7. N. J. Tubo *et al.*, Most microbe-specific naïve CD4<sup>+</sup> T cells produce memory cells during
- 480 infection. *Science* **351**, 511-514 (2016).
- 481 8. Noah J. Tubo *et al.*, Single Naive CD4+ T Cells from a Diverse Repertoire Produce Different Effector Cell
- 482 Types during Infection. *Cell* **153**, 785-796 (2013).
- 483 9. J. J. O'Shea, W. E. Paul, Mechanisms Underlying Lineage Commitment and Plasticity of Helper CD4+T
- 484 Cells. *Science* **327**, 6 (2010).
- 485 10. S. N. Harbour, C. L. Maynard, C. L. Zindl, T. R. Schoeb, C. T. Weaver, Th17 cells give rise to Th1 cells that
- 486 are required for the pathogenesis of colitis. *Proc Natl Acad Sci U S A* **112**, 7061-7066 (2015).
- 487 11. M. J. McGeachy *et al.*, TGF-beta and IL-6 drive the production of IL-17 and IL-10 by T cells and restrain
- 488 T(H)-17 cell-mediated pathology. *Nat Immunol* **8**, 1390-1397 (2007).
- 489 12. N. Yosef *et al.*, Dynamic regulatory network controlling TH17 cell differentiation. *Nature* **496**, 461-468
- 490 (2013).
- 491 13. M. Ciofani *et al.*, A Validated Regulatory Network for Th17 Cell Specification. *Cell* **151**, 289-303 (2012).
- 492 14. B. Zhang *et al.*, MicroRNA-23a Curbs Necrosis during Early T Cell Activation by Enforcing Intracellular
- 493 Reactive Oxygen Species Equilibrium. *Immunity* **44**, 568-581 (2016).
- 494 15. C. E. Zielinski *et al.*, Pathogen-induced human TH17 cells produce IFN-gamma or IL-10 and are regulated
- 495 by IL-1beta. *Nature* **484**, 514-518 (2012).
- 496 16. M. Resende *et al.*, <em>Leishmania</em>-Infected MHC Class II<sup>+</sup> Dendritic Cells Polarize CD4<sup>+</sup>
- 497 T Cells toward a Nonprotective T-
- 498 bet<sup>+</sup> IFN-γ<sup>+</sup> IL-10<sup>+</sup> Phenotype.
- 499 *The Journal of Immunology* **191**, 262 (2013).
- 500 17. K.-D. Park, L. Marti, J. Kurtzberg, P. Szabolcs, In vitro priming and expansion of cytomegalovirus-specific
- 501 Th1 and Tc1 T cells from naive cord blood lymphocytes. *Blood* **108**, 1770 (2006).
- 502 18. E. Eppler *et al.*, Human dendritic cells process and present Listeria antigens for in vitro priming of
- 503 autologous CD4+ T lymphocytes. *Histochemistry and Cell Biology* **123**, 169-178 (2005).
- 504 19. N. A. Gomes, V. Barreto-de-Souza, G. A. DosReis, Early in vitro priming of distinct T(h) cell subsets
- 505 determines polarized growth of visceralizing Leishmania in macrophages. *International immunology* **12**,
- 506 1227-1233 (2000).
- 507 20. F. F. Verdan *et al.*, Dendritic cell are able to differentially recognize *Sporothrix schenckii* antigens and
- 508 promote Th1/Th17 response in vitro. *Immunobiology* **217**, 788-794 (2012).
- 509 21. S. Becattini *et al.*, Functional heterogeneity of human memory CD4<sup>+</sup> T cell clones primed by
- 510 pathogens or vaccines. *Science* **347**, 400-406 (2015).
- 511 22. J. Helft *et al.*, GM-CSF Mouse Bone Marrow Cultures Comprise a Heterogeneous Population of
- 512 CD11c<sup>+</sup>MHCII<sup>+</sup> Macrophages and Dendritic Cells. *Immunity* **42**, 1197-1211
- 513 (2015).
- 514 23. Y. Xu, Y. Zhan, A. M. Lew, S. H. Naik, M. H. Kershaw, Differential Development of Murine Dendritic Cells
- 515 by GM-CSF versus Flt3 Ligand Has Implications for Inflammation and Trafficking. *The Journal of*
- 516 *Immunology* **179**, 7577 (2007).

- 517 24. N. Yi Rang, J. Daun, G. Gyo Jeong, S. and Seung Hyeok, GM-CSF Grown Bone Marrow Derived Cells Are  
518 Composed of Phenotypically Different Dendritic Cells and Macrophages. *Mol. Cells* **39**, 734-741 (2016).
- 519 25. D. Corti, F. Sallusto, A. Lanzavecchia, High throughput cellular screens to interrogate the human T and B  
520 cell repertoires. *Current opinion in immunology* **23**, 430-435 (2011).
- 521 26. J. Geginat, F. Sallusto, A. Lanzavecchia, Cytokine-driven Proliferation and Differentiation of Human  
522 Naive, Central Memory, and Effector Memory CD4<sup>+</sup> T Cells. *The Journal of*  
523 *Experimental Medicine* **194**, 1711 (2001).
- 524 27. J. W. Collins *et al.*, *Citrobacter rodentium*: infection, inflammation and the microbiota. *Nat Rev Micro* **12**,  
525 612-623 (2014).
- 526 28. C. Hsieh *et al.*, Development of TH1 CD4<sup>+</sup> T cells through IL-12 produced by Listeria-induced  
527 macrophages. *Science* **260**, 547-549 (1993).
- 528 29. L. Lin *et al.*, Th1-Th17 Cells Mediate Protective Adaptive Immunity against *Staphylococcus aureus* and  
529 *Candida albicans* Infection in Mice. *PLoS pathogens* **5**, e1000703 (2009).
- 530 30. K. Ghoreschi, A. Laurence, X.-P. Yang, K. Hirahara, J. J. O'Shea, T helper 17 cell heterogeneity and  
531 pathogenicity in autoimmune disease. *Trends in immunology* **32**, 395-401 (2011).
- 532 31. W. Hu, Ty D. Troutman, R. Edukulla, C. Pasare, Priming Microenvironments Dictate Cytokine  
533 Requirements for T Helper 17 Cell Lineage Commitment. *Immunity* **35**, 1010-1022 (2011).
- 534 32. N. Gagliani *et al.*, Th17 cells transdifferentiate into regulatory T cells during resolution of inflammation.  
535 *Nature* **523**, 221-225 (2015).
- 536 33. K. Hirota *et al.*, Fate mapping of IL-17-producing T cells in inflammatory responses. *Nat Immunol* **12**,  
537 255-263 (2011).
- 538 34. W. Elyaman *et al.*, IL-9 induces differentiation of TH17 cells and enhances function of FoxP3<sup>+</sup> natural  
539 regulatory T cells. *Proceedings of the National Academy of Sciences* **106**, 12885-12890 (2009).
- 540 35. B. Stockinger, S. Omenetti, The dichotomous nature of T helper 17 cells. *Nat Rev Immunol* **advance**  
541 **online publication**, (2017).
- 542 36. L. Zhou, D. R. Littman, Transcriptional regulatory networks in Th17 cell differentiation. *Current opinion in*  
543 *immunology* **21**, 146-152 (2009).
- 544 37. Y. K. Lee *et al.*, Late developmental plasticity in the T helper 17 lineage. *Immunity* **30**, 92-107 (2009).
- 545 38. M. H. Lexberg *et al.*, Th memory for interleukin-17 expression is stable in vivo. *European journal of*  
546 *immunology* **38**, 2654-2664 (2008).
- 547 39. S. V. Kim *et al.*, Modulation of cell adhesion and motility in the immune system by Myo1f. *Science* **314**,  
548 136-139 (2006).
- 549 40. A. Gerard *et al.*, Detection of rare antigen-presenting cells through T cell-intrinsic meandering motility,  
550 mediated by Myo1g. *Cell* **158**, 492-505 (2014).
- 551 41. J. Li, E. Lu, T. Yi, J. G. Cyster, EB12 augments Tfh cell fate by promoting interaction with IL-2-quenching  
552 dendritic cells. *Nature* **533**, 110 (2016).
- 553 42. B. Wu, S. P. Crampton, C. C. W. Hughes, Wnt signaling induces MMP expression and regulates T cell  
554 transmigration. *Immunity* **26**, 227-239 (2007).
- 555 43. S. Cerboni *et al.*, Intrinsic antiproliferative activity of the innate sensor STING in T lymphocytes. *The*  
556 *Journal of Experimental Medicine*, (2017).
- 557 44. J. T. Chang, E. J. Wherry, A. W. Goldrath, Molecular regulation of effector and memory T cell  
558 differentiation. *Nat Immunol* **15**, 1104-1115 (2014).
- 559 45. Y. Pan *et al.*, Survival of tissue-resident memory T cells requires exogenous lipid uptake and metabolism.  
560 *Nature* **543**, 252 (2017).
- 561 46. L. Z. Shi *et al.*, HIF1 $\alpha$ -dependent glycolytic pathway orchestrates a metabolic checkpoint for the  
562 differentiation of T<sub>H</sub>17 and T<sub>reg</sub> cells. *The Journal of Experimental Medicine*  
563 **208**, 1367-1376 (2011).
- 564 47. A. T. Waickman, J. D. Powell, mTOR, metabolism, and the regulation of T-cell differentiation and  
565 function. *Immunological reviews* **249**, 43-58 (2012).



- 566 48. R. Wang *et al.*, The transcription factor Myc controls metabolic reprogramming upon T lymphocyte  
567 activation. *Immunity* **35**, 871-882 (2011).
- 568 49. J. F. Purton *et al.*, Antiviral CD4(+) memory T cells are IL-15 dependent. *The Journal of Experimental*  
569 *Medicine* **204**, 951-961 (2007).
- 570 50. J. Li, G. Huston, S. L. Swain, IL-7 Promotes the Transition of CD4 Effectors to Persistent Memory Cells.  
571 *The Journal of Experimental Medicine* **198**, 1807-1815 (2003).
- 572 51. C. J. Luckey *et al.*, Memory T and memory B cells share a transcriptional program of self-renewal with  
573 long-term hematopoietic stem cells. *Proceedings of the National Academy of Sciences of the United*  
574 *States of America* **103**, 3304-3309 (2006).
- 575 52. T. Agaloti, E. J. Villablanca, S. Huber, N. Gagliani, TH17 cell plasticity: The role of dendritic cells and  
576 molecular mechanisms. *Journal of Autoimmunity* **87**, 50-60 (2018).
- 577 53. J. Shi *et al.*, Inflammatory caspases are innate immune receptors for intracellular LPS. *Nature* **514**, 187-  
578 192 (2014).
- 579 54. S. Mariathasan *et al.*, Differential activation of the inflammasome by caspase-1 adaptors ASC and Ipaf.  
580 *Nature* **430**, 213 (2004).
- 581 55. I. Rauch *et al.*, NAIP-NLRC4 Inflammasomes Coordinate Intestinal Epithelial Cell Expulsion with  
582 Eicosanoid and IL-18 Release via Activation of Caspase-1 and -8. *Immunity* **46**, 649-659 (2017).
- 583 56. G. Doitsh *et al.*, Cell death by pyroptosis drives CD4 T-cell depletion in HIV-1 infection. *Nature* **505**, 509-  
584 514 (2014).
- 585 57. N. L. Galloway *et al.*, Cell-to-Cell Transmission of HIV-1 Is Required to Trigger Pyroptotic Death of  
586 Lymphoid-Tissue-Derived CD4 T Cells. *Cell reports* **12**, 1555-1563 (2015).
- 587 58. F. Martinon, K. Burns, J. Tschopp, The Inflammasome: A Molecular Platform Triggering Activation of  
588 Inflammatory Caspases and Processing of proIL- $\beta$ . *Molecular Cell* **10**, 417-426 (2002).
- 589 59. C. Sutton, C. Brereton, B. Keogh, K. H. Mills, E. C. Lavelle, A crucial role for interleukin (IL)-1 in the  
590 induction of IL-17-producing T cells that mediate autoimmune encephalomyelitis. *J Exp Med* **203**, 1685-  
591 1691 (2006).
- 592 60. M. Lamkanfi, M. Kalai, X. Saelens, W. Declercq, P. Vandenabeele, Caspase-1 Activates Nuclear Factor of  
593 the  $\kappa$ -Enhancer in B Cells Independently of Its Enzymatic Activity. *Journal of Biological Chemistry* **279**,  
594 24785-24793 (2004).
- 595 61. A. F. Paroli *et al.*, NLRP3 Inflammasome and Caspase-1/11 Pathway Orchestrate Different Outcomes in  
596 the Host Protection Against *Trypanosoma cruzi* Acute Infection. *Frontiers in Immunology* **9**, (2018).
- 597 62. D. V. Ostanin *et al.*, T cell transfer model of chronic colitis: concepts, considerations, and tricks of the  
598 trade. *American Journal of Physiology - Gastrointestinal and Liver Physiology* **296**, G135-G146 (2009).
- 599 63. B. Jens, R. Jörg, N. M. H., C. M. H., Enteric bacterial antigens activate CD4+ T cells from scid mice with  
600 inflammatory bowel disease. *European Journal of Immunology* **31**, 23-31 (2001).
- 601 64. T. L. Denning *et al.*, Functional specializations of intestinal dendritic cell and macrophage subsets that  
602 control Th17 and regulatory T cell responses are dependent on the T cell/APC ratio, source of mouse  
603 strain, and regional localization. *J Immunol* **187**, 733-747 (2011).
- 604 65. A. Schlitzer *et al.*, IRF4 Transcription Factor-Dependent CD11b<sup>+</sup> Dendritic Cells in Human  
605 and Mouse Control Mucosal IL-17 Cytokine Responses. *Immunity* **38**, 970-983 (2013).
- 606 66. K. Atarashi *et al.*, Th17 Cell Induction by Adhesion of Microbes to Intestinal Epithelial Cells. *Cell*, (2015).
- 607 67. Ivanov, II *et al.*, Induction of intestinal Th17 cells by segmented filamentous bacteria. *Cell* **139**, 485-498  
608 (2009).
- 609 68. P. J. Shaw *et al.*, Critical Role for PYCARD/ASC in the Development of Experimental Autoimmune  
610 Encephalomyelitis. *Journal of immunology (Baltimore, Md. : 1950)* **184**, 4610-4614 (2010).
- 611 69. R. Furlan *et al.*, Caspase-1 Regulates the Inflammatory Process Leading to Autoimmune Demyelination.  
612 *The Journal of Immunology* **163**, 2403 (1999).
- 613 70. B. Siegmund, H.-A. Lehr, G. Fantuzzi, C. A. Dinarello, IL-1 $\beta$ -converting enzyme (caspase-1) in intestinal  
614 inflammation. *Proceedings of the National Academy of Sciences* **98**, 13249 (2001).

- 615 71. S. J. Lalor *et al.*, Caspase-1–Processed Cytokines IL-1 $\beta$  and IL-18 Promote IL-17 Production by  $\gamma\delta$  and CD4  
616 T Cells That Mediate Autoimmunity. *The Journal of Immunology* **186**, 5738 (2011).
- 617 72. G. Arbore *et al.*, T helper 1 immunity requires complement-driven NLRP3 inflammasome activity in  
618 CD4<sup>+</sup> T cells. *Science* **352**, (2016).
- 619 73. B. N. Martin *et al.*, T cell–intrinsic ASC critically promotes TH17-mediated experimental autoimmune  
620 encephalomyelitis. *Nature Immunology* **17**, 583 (2016).
- 621 74. B. J. Ferguson *et al.*, AIRE's CARD Revealed, a New Structure for Central Tolerance Provokes  
622 Transcriptional Plasticity. *Journal of Biological Chemistry* **283**, 1723-1731 (2008).
- 623 75. J. Bertin *et al.*, CARD9 Is a Novel Caspase Recruitment Domain-containing Protein That Interacts With  
624 BCL10/CLAP and Activates NF- $\kappa$ B. *Journal of Biological Chemistry* **275**, 41082-41086 (2000).
- 625 76. A. Denes, G. Lopez-Castejon, D. Brough, Caspase-1: is IL-1 just the tip of the ICEberg? *Cell Death &  
626 Disease* **3**, e338 (2012).
- 627 77. H. H. Park *et al.*, The Death Domain Superfamily in Intracellular Signaling of Apoptosis and Inflammation.  
628 *Annual Review of Immunology* **25**, 561-586 (2007).
- 629 78. J. J. Moon *et al.*, Tracking epitope-specific T cells. *Nat Protoc* **4**, 565-581 (2009).
- 630 79. M. Wölfl, P. D. Greenberg, Antigen-specific activation and cytokine-facilitated expansion of naive,  
631 human CD8<sup>+</sup> T cells. *Nat. Protocols* **9**, 950-966 (2014).
- 632 80. M. Merad, P. Sathe, J. Helft, J. Miller, A. Mortha, The dendritic cell lineage: ontogeny and function of  
633 dendritic cells and their subsets in the steady state and the inflamed setting. *Annu Rev Immunol* **31**, 563-  
634 604 (2013).
- 635 81. Melissa A. Kinnebrew *et al.*, Interleukin 23 Production by Intestinal CD103<sup>+</sup>CD11b<sup>+</sup> Dendritic Cells in  
636 Response to Bacterial Flagellin Enhances Mucosal Innate Immune Defense. *Immunity* **36**, 276-287  
637 (2012).
- 638 82. S. N. Furlan *et al.*, Enhancement of anti-tumor CD8 immunity by IgG1-mediated targeting of Fc  
639 receptors. *mAbs* **6**, 108-118 (2014).

640

641 **Acknowledgements**

642 We thank all members of the Pasare lab for helpful discussions and critical reading of the  
643 manuscript, Linley Riediger for mouse colony management and genotyping. We thank the  
644 members of Genomics and Microarray Core at UT Southwestern Medical Center for their help  
645 with the RNA sequencing experiments. Bret Evers, M.D., Ph.D. kindly performed histopathology  
646 analysis and blind scoring of the sections. Russell. E. Vance, Ph.D. at University of California,  
647 Berkeley, CA, generously provided Casp1 $\Delta$ 10 mice. Fayyaz S. Sutterwala, M.D., Ph.D., at  
648 Cedars Sinai Medical Center kindly provided *I1b*<sup>-/-</sup> mice. Vishva Dixit, M.D., kindly provided *Asc*<sup>-/-</sup>  
649 mice.

650 **Author Contributions**

651 Conceptualization, Y.G., E.K.W., and C.P.; Methodology, Y.G., K.D., A.J., and C.P.;  
652 Investigation, Y.G., K.D., and A.J., R.A.I.C.; Formal Analysis, Y.G., I.D. and C.P.; Writing-  
653 Original Draft, Y.G. and C.P.; Writing-Review and Editing, Y.G., E.K.W., and C.P.; Resources,  
654 I.D. and I.R.; Data Curation, I.D.; Funding Acquisition, C.P.

655 **Competing interests:** The authors declare no competing interests.

656 **Funding:** This work was supported by grants from the National Institutes of Health (AI113125  
657 and AI123176) to C.P.; K.D. was supported by American Heart Association Grant  
658 #17PRE33410075.

659



660 **Figure and Figure Legends**

**Figure 1**

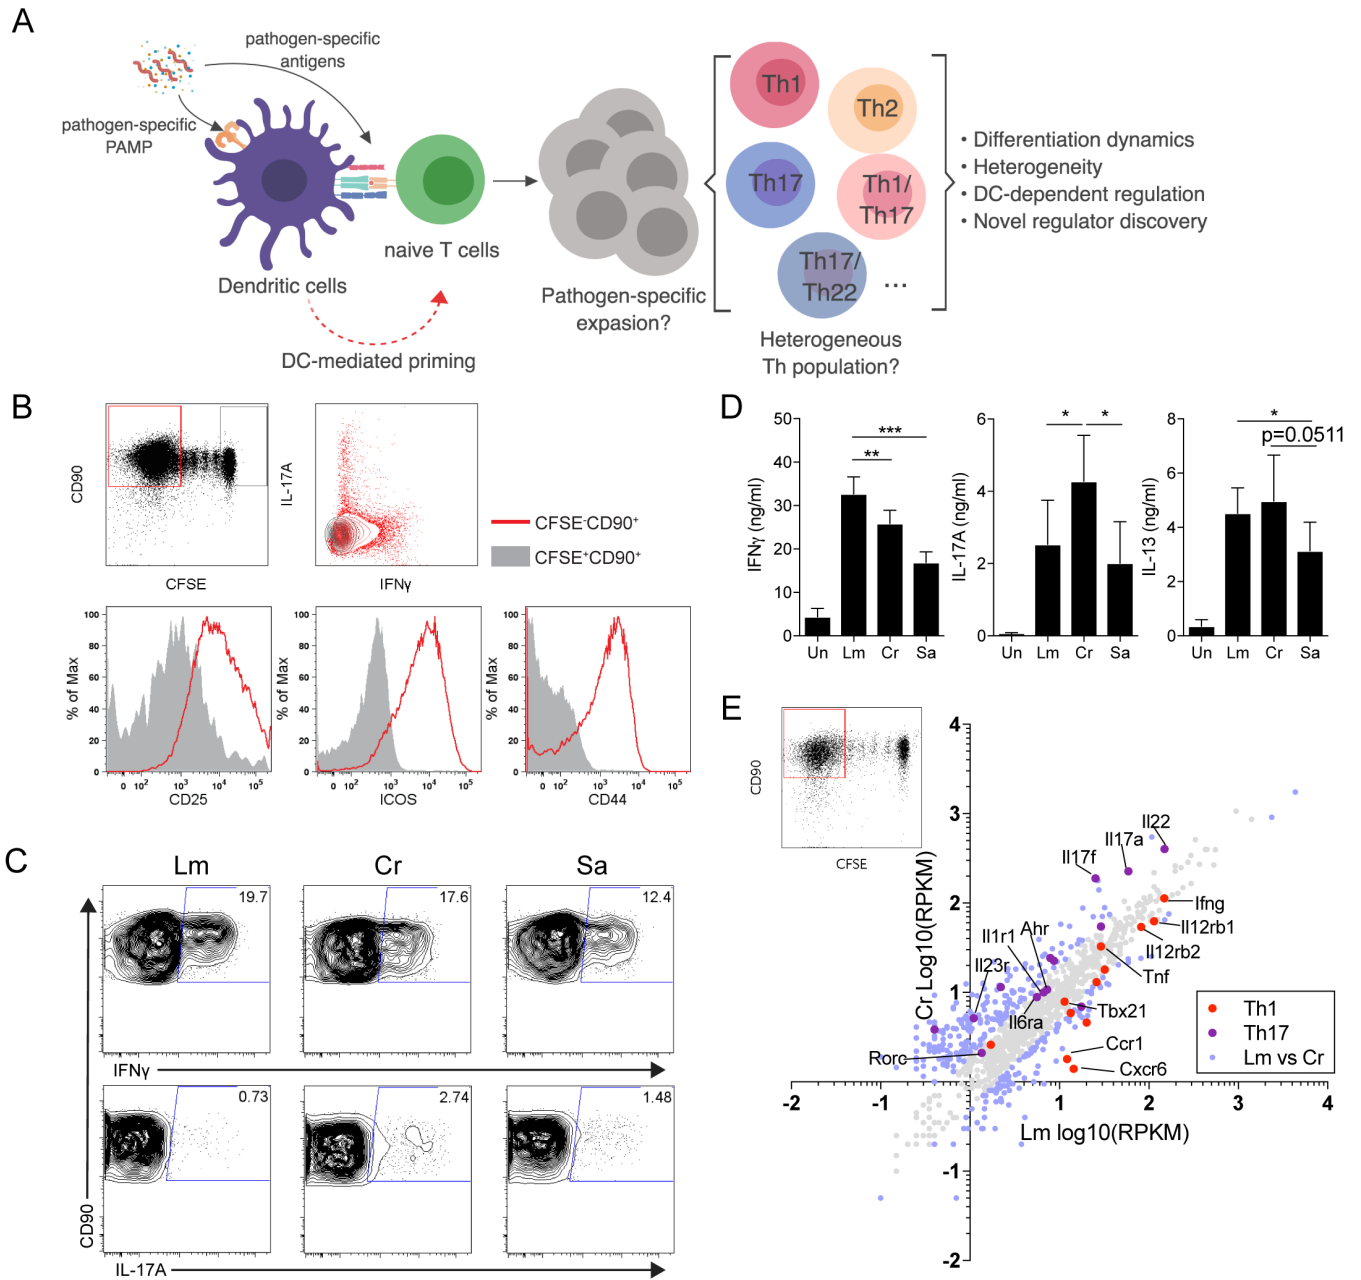

661

662 **Fig. 1. An *in vitro* priming approach to generate functional pathogen-specific CD4 T cells**

663 (A) Schematic overview of the priming system and workflow.

664 (B) (upper row) Representative CFSE dilution graph and cytokine (IFN $\gamma$  and IL-17A) staining  
665 from CFSE<sup>+</sup> and CFSE<sup>-</sup> fraction. (lower row) Histogram of CD25, CD44 and ICOS from CFSE<sup>+</sup>  
666 and CFSE<sup>-</sup> fraction. Cells were co-cultured for 10-12 days before analysis.

667 (C) Representative intracellular staining of IFN $\gamma$ - and IL-17A-producing CD4 T cells following  
668 priming by CD11c<sup>+</sup> DCs stimulated with Lm, Cr or Sa lysates.

669 (D) Level of IFN $\gamma$ , IL-17A and IL-13 in the supernatants of co-cultures as in (C), measured by  
670 ELISA.

671 (E) Scatter plot representing mRNA expression values ( $\log_{10}$ RPKM) of Lm- or Cr-specific CFSE<sup>-</sup>  
672 T cells from RNA-sequencing, data are pooled and averaged from two independent samples.  
673 Blue data points indicate differentially (fold change $\geq$ 2) expressed genes.

674 All plots are pre-gated on live cells. Data are representative or pooled from at least 2 independent  
675 experiments.

676

## Figure 2

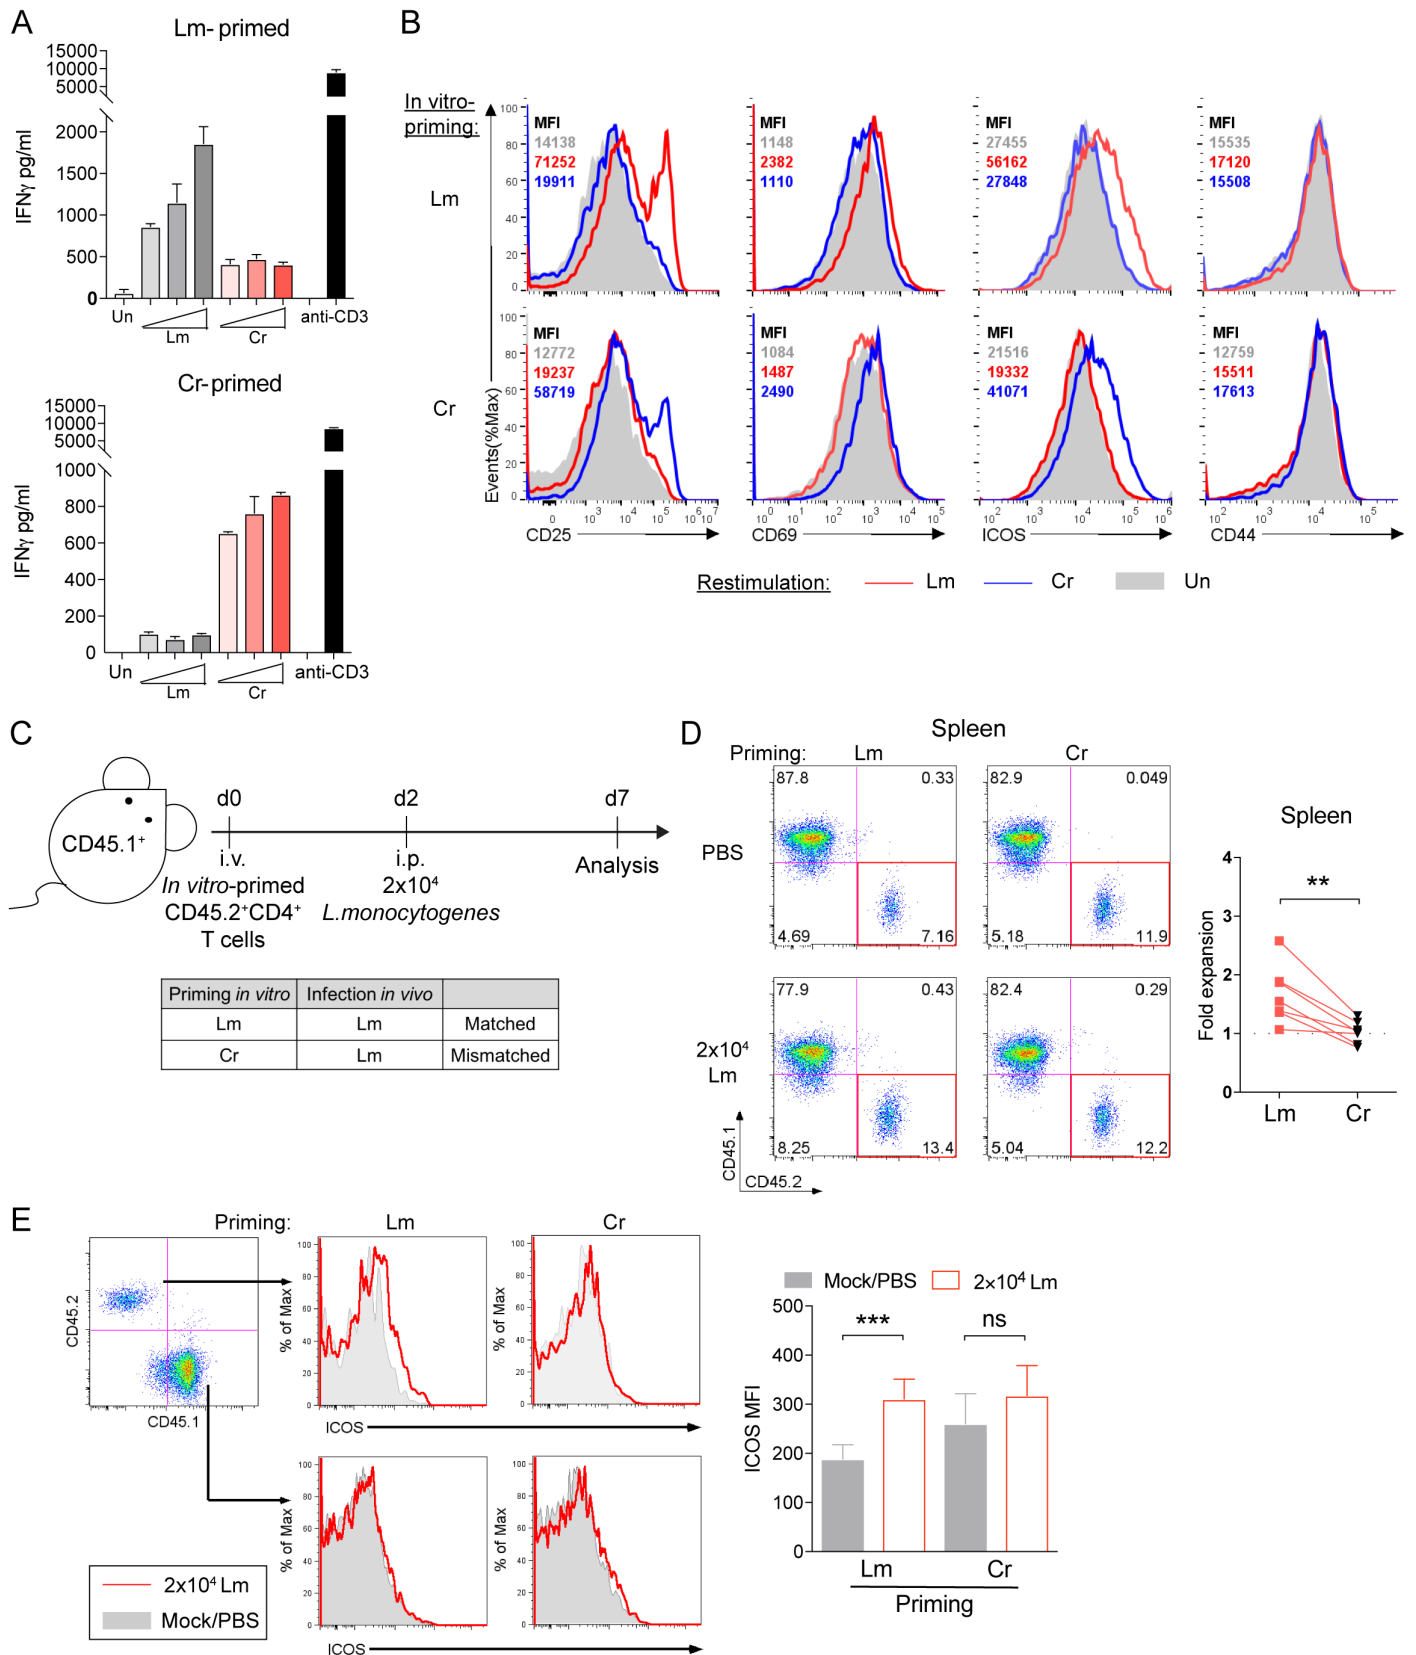

678 **Fig. 2. *In vitro* pathogen-primed CD4 T cells exhibit specificity towards the priming**  
679 **pathogen**

680 (A) IFN $\gamma$  quantities in the culture supernatant of Lm- (upper panel) or Cr- (lower panel) primed  
681 CD4 T cells that were cultured for 48 hours with unstimulated or Lm/Cr-fed, irradiated B cells.  
682 Lm and Cr concentrations used for restimulation were titrated at 3, 10 and 30 $\mu$ g/ml. Data are  
683 representative of 4 independent experiments. Culture supernatants from anti-CD3 (30 ng/ml)  
684 stimulated T cells we also assessed for IFN $\gamma$  production as the positive control. Data are  
685 representative of 3 independent experiments.

686 (B) Histogram and MFI (upper left corner) of CD25, CD69, ICOS and CD44 on the CD90<sup>+</sup> T cells  
687 from the same experiments in Figure 2A denoting upregulation of indicated activation markers  
688 in response to Lm/Cr rechallenge. Lysate concentration=10 $\mu$ g/ml. Data are representative of 2  
689 independent experiments.

690 (C) (upper) Experimental design for testing *in vivo* specificity and (lower) mismatch scheme.

691 (D) Representative flow cytometry analysis and quantified percentages (right) of transferred (*in*  
692 *vitro* primed with Lm or Cr) CD4 T cells in the spleen at day 5 post-infection (shown as fold  
693 change comparing CD45.2<sup>+</sup>% of infected mouse to paired PBS control). n=7 mice per group.

694 (E) Mean fluorescent intensity (MFI) of surface ICOS on donor CD45.2<sup>+</sup> T cells and recipient  
695 endogenous CD45.1<sup>+</sup> T cells from the same experiments in Figure 2D and quantified for CD45.2<sup>+</sup>  
696 T cells (right). n=7 mice per group.

697 Error bars represent mean  $\pm$  SEM and p values were determined by paired Student's t-test. \*\*p <  
698 0.01, \*\*\*p < 0.001.

699

700

## Figure 3

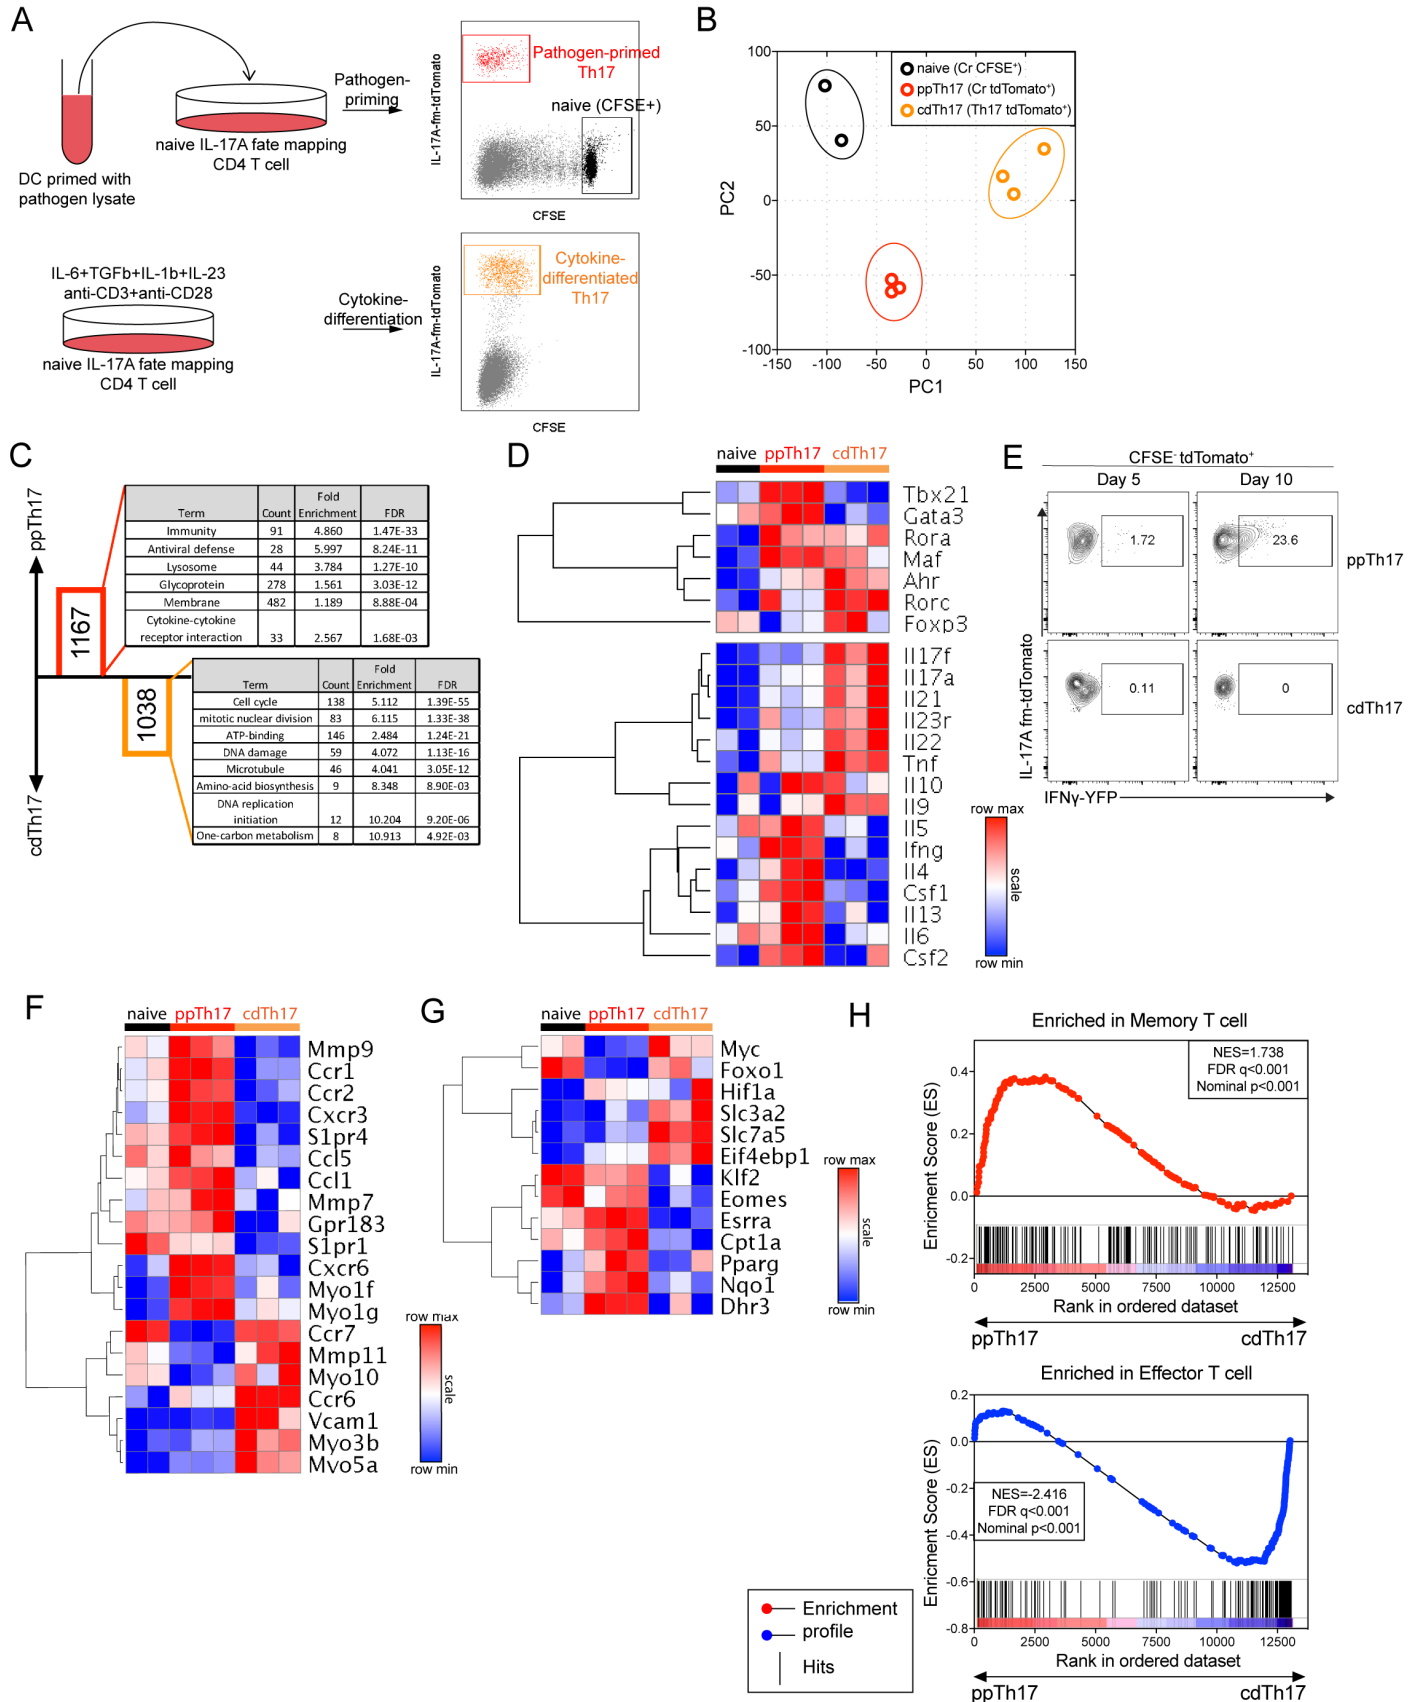

702 **Fig. 3. Comparative transcriptional analysis reveals major divergence in programming**  
703 **between pathogen-primed Th17 and cytokine-polarized Th17 cells**

704 (A) Experimental design for transcriptome profiling of pathogen-primed or cytokine-  
705 differentiated Th17 cells.

706 (B) PCA analysis of whole transcriptome expression of CFSE<sup>+</sup> (naïve), Cr-specific (ppTh17,  
707 day 12) or cytokine-differentiated (cdTh17) Th17 cells. Each data point indicates one  
708 independent replicate.

709 (C) The number of genes specifically upregulated in ppTh17 (red) or cdTh17 (orange) cells and  
710 their functional annotation enrichment analyzed by DAVID.

711 (D) Heatmap and hierarchical analysis of key T cell transcription factors, cytokines and cytokine  
712 receptor expression from transcriptome profiling described in Figure 3A. Replicates are shown  
713 in each column.

714 (E) Representative flow plots showing YFP<sup>+</sup>% of CFSE<sup>-</sup>tdTomato<sup>+</sup> population, from 17-γ double  
715 reporter T cells under ppTh17 (Cr-primed) or cdTh17 conditions at early (day 5) and late (day  
716 10) stage of differentiation. For day 10 cdTh17 cells, polarizing cytokines were removed from  
717 the culture after day 5 and cells are maintained in 10ng/ml rIL-2 media from day 5 to day 10.  
718 Data are representative of two independent experiments.

719 (F) Heatmap and hierarchical analysis of gene expression for gene cluster involved in *in vivo* T  
720 cell motility, migration, chemokine and chemokine receptor signaling, T cell positioning and  
721 antigen sampling.

722 (G) Heatmap and hierarchical analysis of gene expression for genes involved in metabolic  
723 processes.

724 (H) GSEA analysis of ppTh17 and cdTh17 cells compared to Molecular Signature dataset of  
725 effector versus memory T cells.

726 Hierarchical clustering was determined by Pearson correlation and pairwise average-linkage.

727

728

## Figure 4

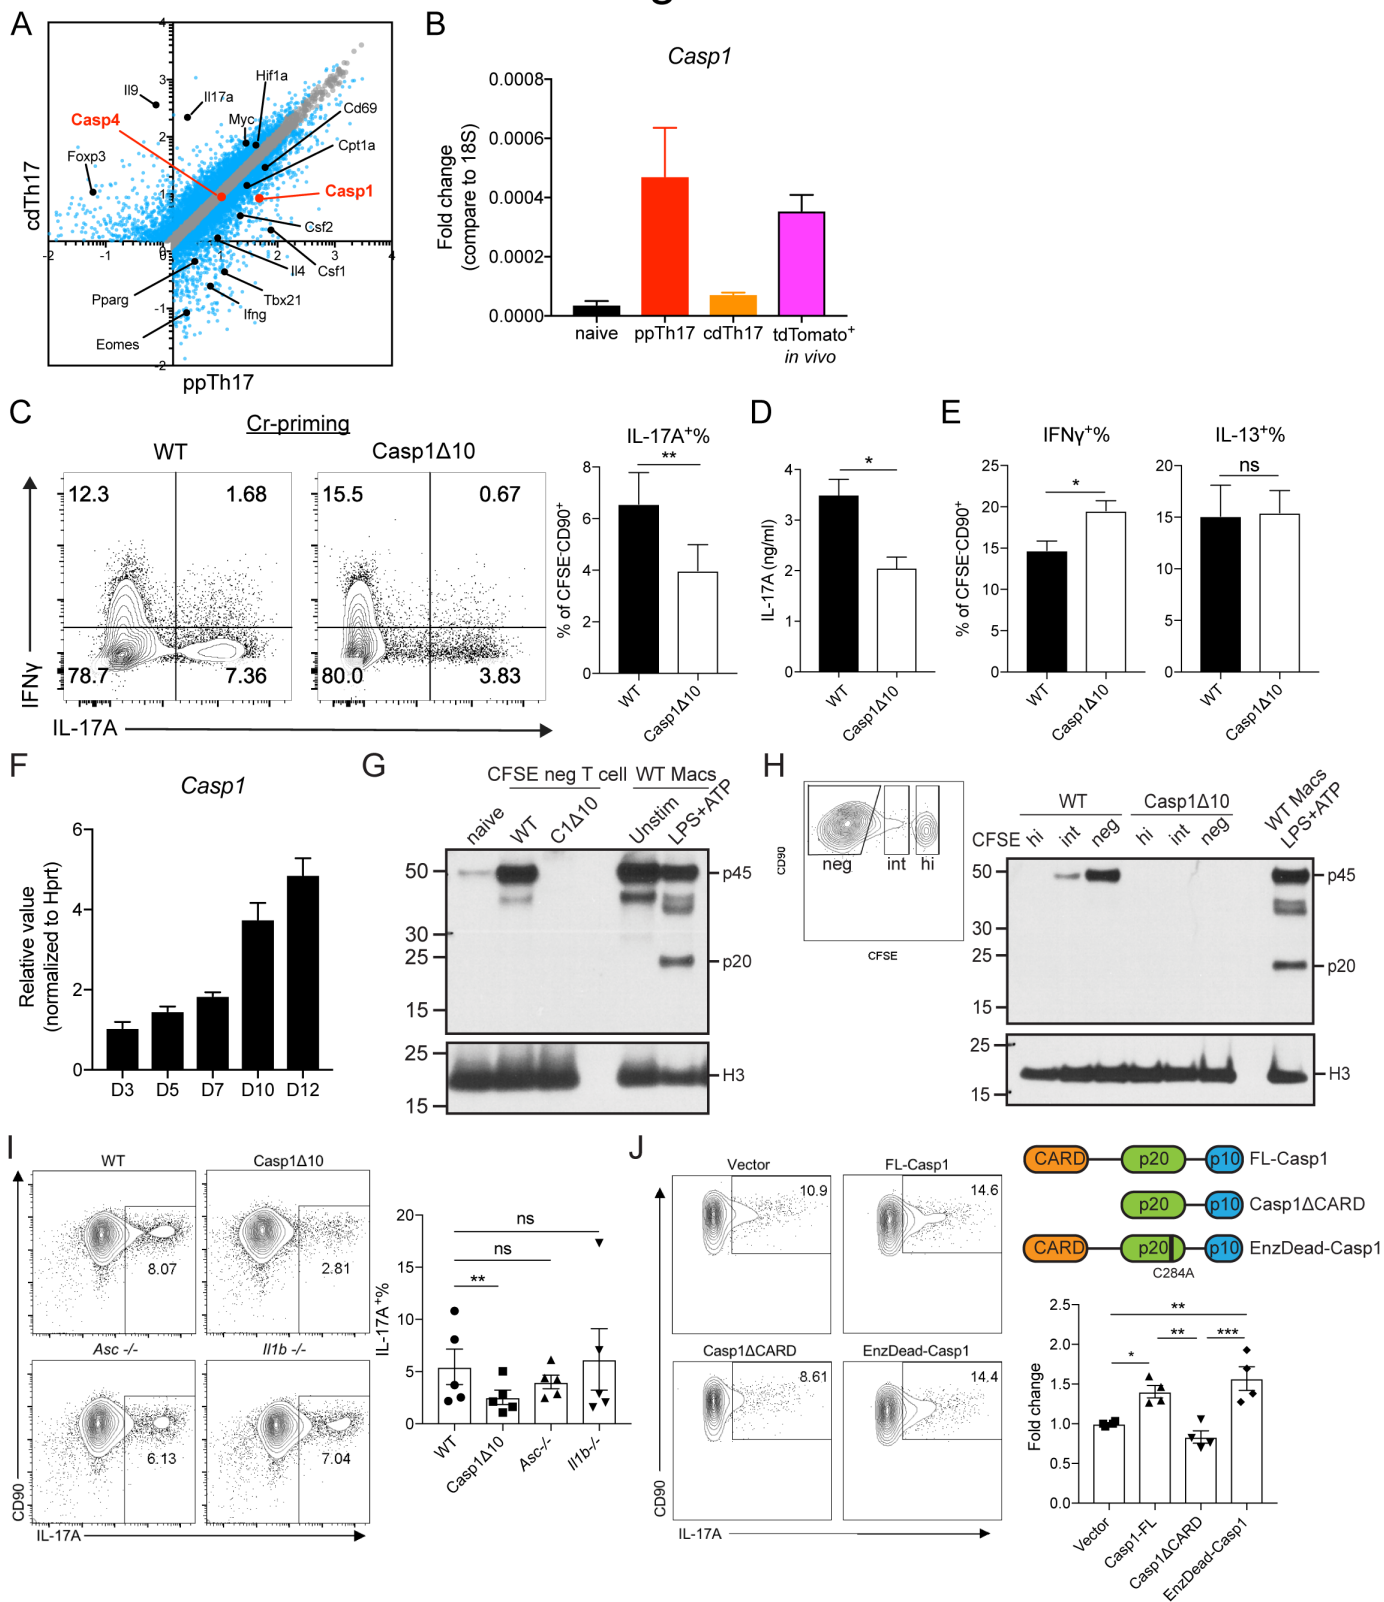

729

730 **Fig. 4. Caspase-1 promotes the differentiation of Th17 lineage independent of its**  
 731 **enzymatic activity or inflammasome activation.**



732 (A) Differentially expressed transcripts between ppTh17 and cdTh17 cells. Each dot represents  
733 the average of three independent experiments. Blue dots indicate differentially regulated genes  
734 (fold change>1.5, FDR<0.05). Black dots indicate differentially regulated transcripts described  
735 in Figure 3. Red dots indicate Casp1 and Casp4 transcripts.

736 (B) mRNA Expression of *Casp1* in sorted naïve (CFSE<sup>+</sup>), ppTh17, cdTh17, or tdTomato<sup>+</sup> cells  
737 from mLN of Cr-infected (day-10 p.i.) 17A-fm mice, quantified by independent qPCR  
738 experiments. n=2.

739 (C) Naïve CD4 T cells from WT or Casp1 $\Delta$ 10 mice were primed *in vitro* by Cr lysate-stimulated  
740 WT splenic CD11c<sup>+</sup> dendritic cells, IL-17A and IFN $\gamma$  productions were measured by intracellular  
741 staining and flow cytometry analysis of CD90<sup>+</sup>CFSE<sup>-</sup> live CD4 T cells (C, left); IL-17A<sup>+</sup>% are  
742 quantified (C, right). n=7 experiments.

743 (D) IL-17A in the supernatant from experiments in (C), measured by ELISA. n=3.

744 (E) IFN $\gamma$ <sup>+</sup>% and IL-13<sup>+</sup>% of CD90<sup>+</sup>CFSE<sup>-</sup> live cells, quantified from experiments in (C). n=7.

745 (F) Relative expression of *Casp1* mRNA at indicated time points post Cr-priming.

746 (G) Western blot analysis of pro-caspase-1 (p45) and cleaved caspase-1 (p20) from naïve CD4  
747 T cells, sorted CD90<sup>+</sup>CFSE<sup>-</sup> Cr-primed CD4 T cells (day-12), bone marrow-derived  
748 macrophages that were unstimulated or under conventional inflammasome activation (4hr  
749 LPS+30min ATP).

750 (H) Western blot analysis of pro-caspase-1 (p45) and cleaved caspase-1 (p20) of Cr-primed  
751 CD4 T cells. Cells are sorted into CFSE<sup>high</sup>, CFSE<sup>intermediate</sup> and CFSE<sup>low</sup> populations (left) and  
752 compared to WT macrophages undergoing inflammasome activation.

753 (I) Intracellular cytokine staining of WT, Casp1 $\Delta$ 10, *Asc*<sup>-/-</sup>, *Il1b*<sup>-/-</sup> CD4 T cells, primed with Cr-  
754 stimulated DCs (left). IL-17A<sup>+</sup>% of CFSE<sup>-</sup>CD90<sup>+</sup> live cells was quantified (right). n=5.

755 (J) Casp1 $\Delta$ 10 CD4 T cells were differentiated to Th17 lineage and retrovirally reconstituted with  
756 MSCV-IRES-hCD2 alone (Vector), full-length Casp1 (FL-Casp1), Casp1 deficient of CARD  
757 (Casp1 $\Delta$ CARD) or enzymatically inactive form of Casp1 (EnzDead-Casp1, C284A) and  
758 quantified for IL-17A<sup>+</sup>% (gated on live, hCD2<sup>+</sup> population). n=4.

759 Statistics represent mean  $\pm$  SEM and p values were determined by paired Student's t-test.

760 \*p<0.05, \*\*p < 0.01, \*\*\*p < 0.001.

761

762

## Figure 5

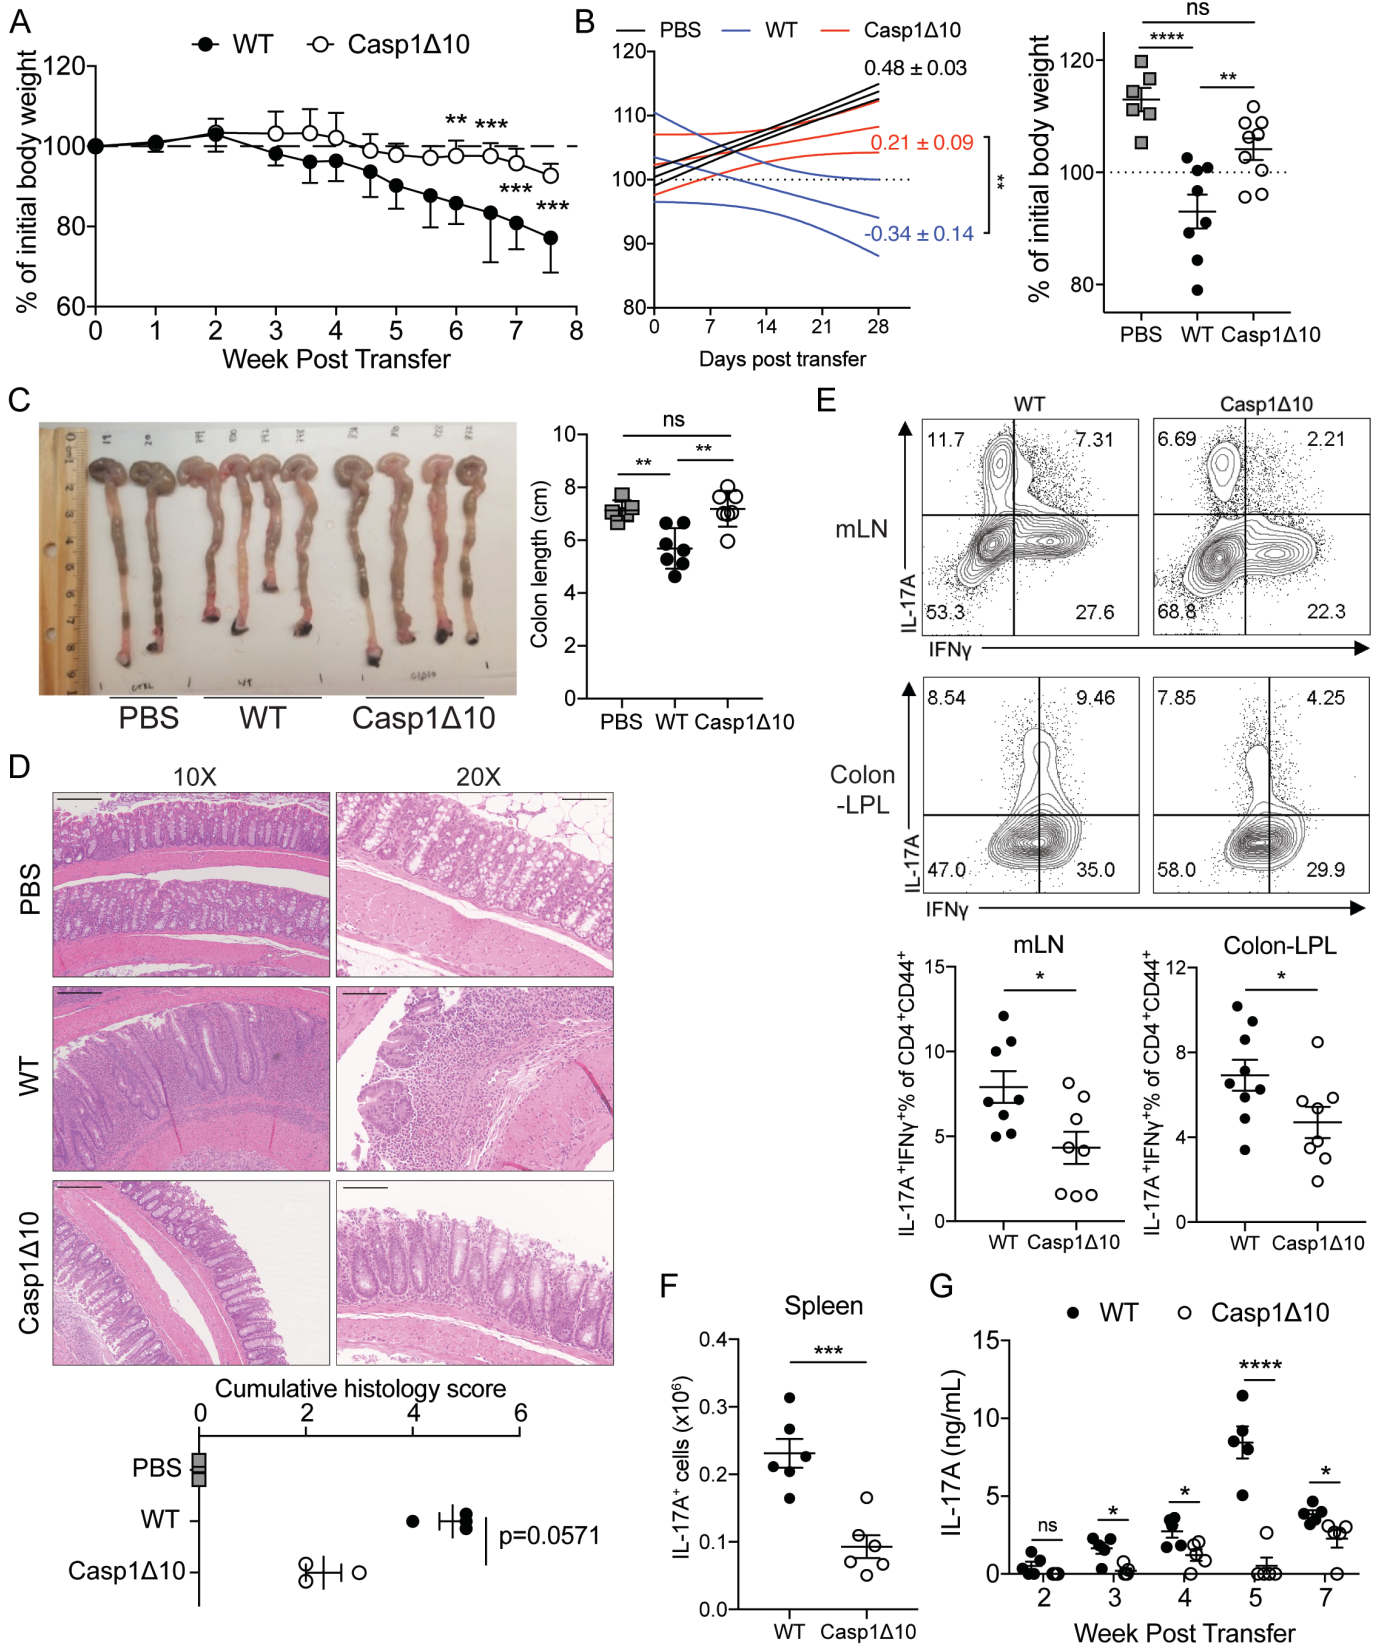

764 **Fig. 5. T-cell-intrinsic caspase-1 is required for Th17-mediated colitis *in vivo*.**

765 (A) Weight change of *Rag1*<sup>-/-</sup> mouse that received WT or Casp1Δ10 naïve CD4 T cells  
766 (CD45RB<sup>hi</sup>) at indicated time points (n=5 mice for each genotype).

767 (B) (left) Linear regression analysis of weight loss progression 0-4 weeks post cell transfer,  
768 progression slope ± SE was shown on the side of each curve. (right) percentage of initial body  
769 weight after 4 weeks. PBS n=6, WT n=8, Casp1Δ10 n=9.

770 (C) Representative picture of colons (left) and measured colon length (right) of *Rag1*<sup>-/-</sup> mice at  
771 8-weeks post naïve CD4 T cell (CD45RB<sup>hi</sup>) transfer (PBS, n=5; WT, n=7; Casp1Δ10, n=7).

772 (D) Representative H&E staining of colon sections from PBS, WT or Casp1Δ10 naïve T cell  
773 transferred *Rag1*<sup>-/-</sup> mice. Images are displayed at 10x magnification to show multiple colonic  
774 regions and 20x magnification to show one consecutive section. Histology slides were blind-  
775 scored by a pathologist at UT Southwestern (lower panel). PBS, n=5; WT, n=4; Casp1Δ10, n=3.

776 (E) Representative flow plots showing the percentages of IL-17A<sup>+</sup>IFNγ<sup>+</sup> of CD4<sup>+</sup>CD90<sup>+</sup>CD44<sup>+</sup> T  
777 cells in the mesenteric lymph nodes (mLN) or colonic lamina propria (Colon-LPL) of *Rag1*<sup>-/-</sup> mice  
778 4 weeks post transfer of WT or Casp1Δ10 naïve CD4 T cells. mLN: WT or Casp1Δ10 n=8. Colon-  
779 LPL: WT n=9; Casp1Δ10 n=8.

780 (F) The number of CD4<sup>+</sup>CD90<sup>+</sup>IL-17A<sup>+</sup> T cells in the spleens of the *Rag1*<sup>-/-</sup> mice that received  
781 WT or Casp1Δ10 naïve CD4 T cells. n=6 per group.

782 (G) Serum IL-17A levels at the indicated time points from the mice in Figure 6F. n=5 mice per  
783 group.

784 Data are representative of 2-3 independent experiments. Statistics represent mean ± SEM and  
785 p values were determined by two-way repeated ANOVA with Bonferroni correction (A), unpaired

786 Student's t-test (B, D-F) or Mann-Whitney U test (C) \* $p < 0.05$ , \*\* $p < 0.01$ , \*\*\* $p < 0.001$ ,  
787 \*\*\*\* $p < 0.0001$ .

788

## 789 **Experimental Procedures**

### 790 Quantification and Statistical analysis

791 Statistical analysis performed is indicated in the figure legends, analyzed by GraphPad Prism 7.  
792 P values < 0.05 were considered statistically significant. Significantly differentially expressed  
793 genes in RNA-seq experiments were determined using encoded Matlab or Gene Pattern  
794 DESeq2 function described in RNA-seq analysis section. Sample sizes were not predetermined  
795 by statistical methods.

### 796 Mice

797 C57BL/6J (RRID:IMSR\_JAX:000664), B6.SJL-*Ptprc<sup>a</sup>* *Pepc<sup>b</sup>*/BoyJ (B6.CD45.1;  
798 RRID:IMSR\_JAX:002014) mice were obtained from Jackson Laboratory and maintained in UT  
799 Southwestern mouse breeding core facility. STOCK II17a<sup>tm1.1(cre)Stck</sup>/J (*II17a-cre*;  
800 RRID:IMSR\_JAX:016879) and B6.129S4-*Ifng*<sup>tm3.1Lky</sup>/J 'GREAT' (*Ifng-ires-yfp*;  
801 RRID:IMSR\_JAX:017581) mice were obtained from Jackson Laboratory and bred in-house to  
802 B6.Cg-Gt(ROSA)26Sor<sup>tm14(CAG-tdTomato)Hze</sup>/J (*Rosa26-flox-stop-flox-tdTomato*;  
803 RRID:IMSR\_JAX:007914) mice (a gift from Morrison Laboratory, UT Southwestern). Casp1Δ10  
804 mice were a kind gift from Drs. Russell Vance and Isabella Rauch ((55), University of California,  
805 Berkeley). *Asc<sup>-/-</sup>* mice were provided by Dr. Vishva Dixit (Genentech). *Il1b<sup>-/-</sup>* mice were provided  
806 by Dr. Fayyaz S. Sutterwala (Cedars Sinai Medical Center). Unless specified, mice were bred  
807 and maintained at the specific pathogen-free facility of UT Southwestern Medical Center,  
808 provided with sterilized food and water *ad libitum*. Mice used for infection experiments were kept  
809 at a conventional animal facility and provided with non-autoclaved food and water *ad libitum*.  
810 Age- and sex-matched mice between 6 and 12 weeks of age were used for all experiments.  
811 Both female and male mice were used in experiments. All mouse experiments were performed

812 as per protocols approved by Institutional Animal Care and Use Committee (IACUC) at UT  
813 Southwestern Medical Center.

#### 814 Bacterial strains

815 *Listeria monocytogenes* (LM 10403 serotype 1, a gift from Dr. James Forman), *Citrobacter*  
816 *rodentium* (strain ICC168, Nalidixic acid-resistant) and *Staphylococcus aureus* (ATCC-25923)  
817 were cultured in agar plate of Brain-Heart Infusion, Luria-Bertani with 30 $\mu$ g/ml nalidixic acid, and  
818 Tryptic Soy Broth respectively. A single colony was chosen and secondarily expanded in the  
819 respective liquid broth with appropriate antibiotics. For *Listeria monocytogenes* infection,  
820 bacteria were grown to log phase (OD<sub>600</sub>=0.6-1) on the day of infection, extensively washed  
821 and resuspended in PBS. Mice were injected intraperitoneally with 2x10<sup>4</sup> colony forming units  
822 (CFU) of *L.monocytogenes*. Tissues were harvested 5 days post infection (p.i.). For *C. rodentium*  
823 infection, mice were intragastrically administered 1% sodium bicarbonate and 20-30min later,  
824 infected with 5x10<sup>8</sup> CFU of *C.rodentium*. mLNs were harvested for cell sorting 10 days p.i.

#### 825 Isolation of mouse lymphocyte populations

826 Spleen and lymph nodes were harvested from 6-12 weeks old mice. Single-cell suspension was  
827 obtained by dissociation using sterile frosted slides and passing through 70 $\mu$ m cell strainer. Red  
828 blood cell lysis was performed as needed. Naïve CD4 T cells were isolated according to  
829 MojoSort kit protocol (Biolegend). The purity of naïve CD4 T cells was constantly monitored and  
830 maintained at >95%CD4<sup>+</sup>MHC-II<sup>-</sup>CD62L<sup>+</sup>CD44<sup>-</sup>. Splenic dendritic cells were isolated from the  
831 spleen of B16-FLT3L melanoma injected mouse. Splenocytes were blocked with Fc block (anti-  
832 CD32/CD16) and stained with CD11c-biotin (Biolegend), subsequently with anti-Biotin beads  
833 (Miltenyi) and isolated using AutoMacs magnetic selection (Miltenyi). The purity of isolated  
834 splenic DCs was maintained at >98% CD11c<sup>+</sup>. For all experiments, dendritic cell donor mice and  
835 naïve CD4 T cell donor mice were age- and sex-matched. B cells were isolated from sex- and



836 age-matched naïve mouse spleen by isolating CD19<sup>+</sup> population using CD19-biotin (BD) and  
837 AutoMacs (Miltenyi). Lamina propria lymphocytes (LPL) were isolated as previously described  
838 (31). All genotypes were co-housed for at least 2 weeks before isolating LPL.

#### 839 Pathogen-specific CD4 T cell priming

840 X-VIVO15 serum-free media (Lonza) was used to avoid T cell activity to bovine serum proteins.  
841 In some experiments, 10% complete RPMI media (RPMI1640 media (Hyclone), 10% Fetal  
842 Bovine Serum (FCS) (Sigma), L-glutamine, Penicillin-Streptomycin, Sodium Pyruvate,  $\beta$ -  
843 mercaptoethanol (Sigma)) was used.

844 CD11c<sup>+</sup> dendritic cells were pulsed with pathogen lysate (10 $\mu$ g/ml, dose titrated to induce the  
845 maximum response and minimum cell death across the panel) at 1x10<sup>6</sup>/ml for 5 hours and then  
846 extensively washed. Naïve T cells were labeled with CFSE (5 $\mu$ M, BioLegend). Dendritic cell and  
847 T cells were co-cultured in 1:5 ratio for 5-12 days, depending on the experiments.

848 For live bacteria stimulation experiment, live bacteria were grown to log phase and extensively  
849 washed with cell culture media and used to infect dendritic cells at multiplicity of infection  
850 (MOI)=6 for 5 hours and incubated in media with gentamicin (200 $\mu$ g/ml, Life Technologies) for 1  
851 hour. Then DCs were washed extensively and cocultured with naïve CD4 T cells. MOI was  
852 determined to match bacteria number with the dose of 10 $\mu$ g /ml lysate.

#### 853 Pathogen-specific T cell response recall by B cell-mediated re-stimulation

854 Pathogen-specific T cells generated using the approach described previously were rested with  
855 the provision of a low dose of IL-2 (10 unit/ml, Biolegend) for additional two days until active  
856 cytokine production waned. B cells were either pulsed with pathogen lysate or blasted with CpG  
857 (The Keck oligonucleotide synthesis facility, Yale University) for 18-24 hours in X-VIVO15  
858 serum-free media, extensively washed and irradiated at the dose of 12 Gy using X-ray irradiator



859 (X-RAD320, Precision X-Ray), and cocultured with T cell in 2:1 ratio. T cell responses were  
860 assessed 48 hours later.

#### 861 T cell polarization (Cytokine-differentiated T cells)

862 Tissue culture-treated plates were coated with 5 $\mu$ g/ml of anti-mouse CD3 (Biolegend) and anti-  
863 mouse CD28 (Tonbo) for 2-4 hours. 1 $\times$ 10<sup>6</sup>/ml Naïve T cells were polarized for 5 days under  
864 Th17 polarization (cdTh17) conditions with 10 $\mu$ g/ml anti-IFN $\gamma$  (Biolegend), 10 $\mu$ g/ml anti-IL-4  
865 (Biolegend), 20ng/ml IL-6 (Peprotech), 5ng/ml TGF $\beta$ 1 (Peprotech), 10ng/ml IL-1 $\beta$  (Peprotech)  
866 and 20ng/ml IL-23 (Biolegend), or Th1 polarization conditions with 10 $\mu$ g/ml anti-IL-4, 50 unit/ml  
867 IL-2 and 10ng/ml IL-12 (Peprotech). For some experiments, polarized cells were removed from  
868 all polarizing cytokines and plate-bound anti-CD3/CD28, washed and cultured with 10U/ml IL-2  
869 for an additional 5 days.

#### 870 Retroviral Transduction of Th17 cells

871 Retrovirus was prepared from 1 $\times$ 10<sup>6</sup> Platinum-E cells transfected with 2.5 $\mu$ g vector and 0.63 $\mu$ g  
872 p<sub>CMV</sub>-EGFP using Lipofectamine-2000 transfection reagent (Thermo). Viral supernatant was  
873 harvested from Platinum-E cultures after 48hrs and 72hrs of transfection. 50U/ml of IL-2  
874 (Biolegend) and 10 $\mu$ g/ml of protamine sulfate (Sigma) was added to virus sup prior to  
875 transduction. Naïve CD4 T cells were prepared and differentiated as described before. 24hrs  
876 and 48hrs after activation, 1 $\times$ 10<sup>6</sup> T cells were transduced with 1ml of Virus sup under spin-  
877 infection of 2,500 rpm for 90min at 32°C. T cells were returned to the original activation media  
878 after spin-infection. 5 days after T cell activation, cells were harvested and performed staining  
879 for hCD2 as transduction efficiency marker, as well as intracellular staining.

880

881

882 T cell adoptive transfer

883 Pathogen-primed CD4 T cells were extensively washed with plain RPMI1640 media without  
884 serum or additives and injected intravenously into the recipient mice ( $2 \times 10^6$  CD25<sup>+</sup>ICOS<sup>+</sup>  
885 cells/mouse). Recipient mice were co-housed with their respective controls and experimental  
886 groups for at least two weeks before the experiment and during the experimental period.

887 T cell transfer model of colitis

888  $5 \times 10^5$  CD4<sup>+</sup>CD62L<sup>hi</sup>CD44<sup>lo</sup>CD45RB<sup>hi</sup>CD25<sup>-</sup> T cells were FACS sorted from spleens and lymph  
889 nodes of mice of each genotype, washed and injected intraperitoneally (i.p.) into *Rag1*<sup>-/-</sup> mice.  
890 Weights were measured weekly from 1-3 weeks and biweekly from 4-7 weeks. Serum was  
891 collected every week via submandibular bleeding. Mice were sacrificed between 7 and 8 weeks  
892 post transfer or when weight loss exceeded 20% of initial weight and colon length was measured  
893 at the time of sacrifice. Mice were sacrificed 4-5 weeks post transfer. Colons were removed from  
894 the cecum to anus, photographed, fixed with formalin and submitted to the University of Texas  
895 Southwestern Molecular Pathology Core for paraffin embedding, sectioning, and H&E staining.  
896 Digital images were obtained using Zeiss Axiovert 100 Inverted Microscope with Jenoptik  
897 Gryphax Camera. Histology scores were blind-scored by a pathologist (Dr. Bret Evers) at UT  
898 Southwestern using the criteria listed in Table S8. LPL cells were isolated from colons of  
899 diseased mice following previously established protocols (67) and intracellular staining was  
900 performed as described in Flow cytometry and FACS section (Supplemental Experimental  
901 Procedures).

902 Enzyme-linked immunosorbent assay (ELISA)

903 Briefly, coating antibodies were diluted and coated in ELISA plate overnight at 4°C. Blocked with  
904 PBS containing 10%FCS or 1%Bovine Serum Albumin (Sigma). Samples were loaded in  
905 duplicates, diluted in blocking buffer and incubated overnight. Detection antibodies were used

906 according to manufacturer's instruction. Protein concentrations were quantified using TMB or  
907 OPD colorimetric assay. Plates were washed extensively in between steps with PBST  
908 (Phosphate buffered saline, 0.05% Tween-20).

#### 909 Western blot analysis

910 Cells were extensively washed with PBS on ice and directly lysed in boiled SDS-containing 2X  
911 Laemmli buffer. Protein concentration was measured by detergent-resistant Bradford assay. 5-  
912 10µg of each lysate was loaded to SDS-Page and immunoblot was performed using standard  
913 protocols. Antibodies used for western blot are listed in the resource table.

#### 914 Plasmids

915 MSCV-IRES-hCD2tm\* vector was described previously (82). Full-length caspase-1 or caspase-  
916 1 deficient of CARD was cloned into backbone using XhoI and NotI locus using primers listed in  
917 Table S1. Enzymatically inactive caspase-1 was cloned by mutating cysteine (TGC) 284 to  
918 alanine (GCT) of the full-length caspase-1.

#### 919 RNA isolation and quantification, qRT-PCR

920 Cells were either sorted into Trizol LS reagent or sorted into complete media and lysed with  
921 Trizol reagent. RNA was extracted using the miRNeasy (Qiagen) and treated with DNase I  
922 (Qiagen), according to the manufacturer's instructions. Quantities of extracted RNA were  
923 determined using NanoDrop2000 for cDNA synthesis or Agilent Bioanalyzer 2100 before RNA-  
924 seq Library preparation. All RNA sent for library preparation qualified for RNA integrity number  
925 (RIN)>8.

926 cDNA synthesis was carried out using M-MLV reverse transcriptase (Invitrogen) in the presence  
927 of RNase inhibitor (Promega). Quantitative RT-PCR was performed using SYBR green  
928 mastermix (Applied Biosystems) and QuantStudio 7 Flex Real-Time PCR System.

929 Data and Software Availability

930 Illustrations were created with Biorender (<https://biorender.io/>). Relevant data software  
931 packages are listed in Table S2. MatLab code used for RNA-seq analysis is described in 'RNA-  
932 sequencing analysis' section (Supplemental Experimental Procedures) and is available upon  
933 request.
